# 1 **Distinct photooxidation-induced cell death pathways** 2 **lead to selective killing of human breast cancer cells**

3  
4 **Ancély F. dos Santos<sup>1</sup>, Alex Inague<sup>1</sup>, Gabriel S. Arini<sup>1</sup>, Letícia F. Terra<sup>1</sup>, Rosangela A.M. Wailemann<sup>1</sup>,**  
5 **André C. Pimentel<sup>1</sup>, Marcos Y. Yoshinaga<sup>1</sup>, Ricardo R. Silva<sup>2</sup>, Divinomar Severino<sup>1</sup>, Daria Raquel Q. de**  
6 **Almeida<sup>1</sup>, Vinícius M. Gomes<sup>1</sup>, Alexandre Bruni-Cardoso<sup>1</sup>, Walter R. Terra<sup>1</sup>, Sayuri Miyamoto<sup>1</sup>,**  
7 **Maurício S. Baptista\*<sup>1</sup> and Leticia Labriola\*<sup>1</sup>**

8 1 Departamento de Bioquímica, Instituto de Química, Universidade de São Paulo (USP), São Paulo,  
9 05508-000, Brazil;

10 2 Faculdade de Ciências Farmacêuticas de Ribeirão Preto, Universidade de São Paulo (USP), Ribeirão  
11 Preto, 14040-903, Brazil;

12 \* Departamento de Bioquímica, Instituto de Química, Bloco 09, sala 976, Universidade de São Paulo,  
13 Av. Professor Lineu Prestes 748, Cidade Universitária, São Paulo, 05508-000, Brazil; +55 11 3091  
14 2039, labriola@iq.usp.br;

15 \* Departamento de Bioquímica, Instituto de Química, Bloco 12, sala 1262, Universidade de São Paulo,  
16 Av. Professor Lineu Prestes 748, Cidade Universitária, São Paulo, 05508-000, Brazil; +55 11 3091-  
17 8952, baptista@iq.usp.br.

18

## 19 **Abstract**

20 Lack of effective treatments for aggressive breast cancer is still a major global health  
21 problem. We previously reported that Photodynamic Therapy using Methylene Blue as  
22 photosensitizer (MB-PDT) massively kills metastatic human breast cancer, marginally  
23 affecting healthy cells. In this study we aimed to unveil the molecular mechanisms  
24 behind MB-PDT effectiveness. Through lipidomic and biochemical approaches we  
25 demonstrated that MB-PDT efficiency and specificity relies on polyunsaturated fatty  
26 acids-enriched membranes and on the better capacity to deal with photooxidative

27 damage displayed by non-tumorigenic cells. We found out that, in tumorigenic cells,  
28 lysosome membrane permeabilization is accompanied by ferroptosis and/or  
29 necroptosis. Our results broadened the understanding of MB-PDT-induced  
30 photooxidation mechanisms and specificity in breast cancer cells. Therefore, we  
31 demonstrated that efficient approaches could be designed on the basis of lipid  
32 composition and metabolic features for hard-to-treat cancers. The results further  
33 reinforce MB-PDT as a therapeutic strategy for highly aggressive human breast cancer  
34 cells.

## 35 **Introduction**

36 Breast cancer is the most frequent malignancy in women worldwide<sup>1,2</sup>. In its advanced  
37 stages, when distant organ metastases occur, it is considered incurable with the  
38 currently available therapies<sup>2</sup>. The reason being that metastatic lesions are usually  
39 multiple, molecular and cellular heterogenous, and resistant to conventional  
40 treatments<sup>3</sup>. Thus, effective and safe therapies for this stage of the disease are still  
41 needed.

42 Photodynamic therapy (PDT) has been the focus of several cancer centers as it might  
43 represent an important advancement in treatment due to its high but also controlled  
44 cytotoxic effect<sup>4</sup>. Additionally, the enhanced antitumor effects combining PDT and  
45 chemotherapies have already been demonstrated in preclinical studies on breast  
46 cancer<sup>3</sup>. PDT consists in the uptake of a photosensitizer (PS) molecule which, upon  
47 excitation by light in a determined wavelength, reacts with oxygen and generates  
48 oxidant species (radicals, singlet oxygen, triplet species) in target tissues, leading to  
49 photooxidative stress (PhOxS)<sup>5,6</sup>, which results in photodamage of membranes and

50 organelles<sup>7,8</sup>. The extent of the damage, and the cell death mechanisms involved, are  
51 dependent on the PS type, concentration, subcellular localization, the amount of energy  
52 and fluence rate applied as well as on the intrinsic characteristics of each tumor type<sup>9-</sup>  
53 <sup>12</sup>. The bottleneck of PDT is that little is known about the complex molecular  
54 mechanisms behind its cytotoxicity and even less about the factors that could improve  
55 its specificity against aggressive cancer cells. In order to address these underpinnings,  
56 our group has been studying PDT using methylene blue as photosensitizer (MB-PDT) in  
57 human breast cell (BC) models.

58 In previous studies we have already reported that there were differences in MB-PDT  
59 sensitivity regarding MB concentration, time to achieve maximal cell death and the  
60 effect of fluence rate<sup>9,13</sup>. Moreover, our results have shown that non-tumorigenic  
61 breast cells are more resistant to MB-PDT, whereas the very aggressive triple negative  
62 breast cancer cells (TNBC) displayed the highest susceptibility<sup>13</sup>. However, the  
63 mechanisms behind these effects are still not well understood. In the present study, we  
64 set out to unveil the molecular mechanisms triggered by this PhOxS therapy that are  
65 responsible for its selectivity in the elimination of human breast cancer cells. For this  
66 purpose we performed a comprehensive and comparative lipidomic profiling of two  
67 breast cancer cell types (MDA-MB-231, a metastatic TNBC cell line<sup>14</sup>; and MCF-7, a  
68 luminal A cell line<sup>15</sup>) and of a non-tumorigenic breast cell, MCF-10A<sup>16</sup>. In addition,  
69 different signaling pathways related to antioxidant cell responses as well as regulated  
70 cell death induction have been investigated.

71 Collectively, our results showed that while MB-PDT is efficient in inducing multiple  
72 regulated necrosis mechanisms only in tumor cells, non-tumorigenic breast cell were

73 able to mount an antioxidant response that led to impairment of the extensive  
74 photooxidative damage. We believe that these data highlight MB-PDT potential to be  
75 safe, accessible and an efficient adjunct to surgery for breast cancer treatment.  
76 Furthermore, this study contributes to the cancer and cell biology fields, providing  
77 further molecular mechanisms explaining why breast cells displaying distinct molecular  
78 makeups are able to undergo different regulated cell death pathways upon the same  
79 trigger.

## 80 **Results**

### 81 *Human breast cells (BC) presenting variations in PDT sensitivity displayed differential* 82 *cellular lipid composition*

83 As a first step in our study, we confirmed previous results from our group<sup>13</sup> by showing  
84 that cell death kinetics after MB-PDT exerted a higher impact in the malignant cell lines,  
85 being TNBC cells the most susceptible (**Figure 1A**). We then set out to investigate the  
86 molecular basis of these cell type specific differential responses to the therapy. Since  
87 MB-PDT relies on a massive intracellular generation of oxidant species<sup>9,13,17</sup>, with a  
88 widespread impact in membranes, we evaluated whether there was a link between the  
89 cellular lipid profile and the sensitivity to MB-PDT. For this purpose, we performed a  
90 comparative lipidomic profiling of BC using reversed-phase ultra-high-performance  
91 liquid chromatography (RP-UHPLC) coupled to electrospray ionization time-of-flight  
92 mass spectrometry (ESI-TOFMS). Around 487 different species were identified and  
93 classified in groups such as sphingolipids (SP), glycerophospholipids (GP), neutral lipids  
94 (NL), free fatty acids (FFA) and coenzyme Q (CoQ). The two first components of the  
95 Principal Component Analysis (PCA) explained 90.6% of the lipid content variance,

96 showing a clear clustering between BC types (**Figure 1B**). Among all the obtained lipid  
97 classes, the main differences between BC were found on the amount of some species of  
98 NL [ex.: cholesteryl ester (CE), ceramide (Cer), diacylglycerol (DG) and triacylglycerol  
99 (TG)], coenzyme Q<sub>10</sub> (CoQ<sub>10</sub>), and some species of GP [ex.: phosphatidylethanolamine  
100 (PE), phosphatidylinositol (PI), phosphatidylglycerol (PG), and phosphatidylcholine (PC),  
101 besides plasmanyl (o)- and plasmenyl (p)-GP, such as oPE, pPE, oPC and pPC (**Figure 1C**  
102 **and Supplementary Figure S1A, S1B**)]. All NL species were more abundant in breast  
103 cancer cells, mainly in TNBC, than in non-tumorigenic cells (**Supplementary Figure S1A**).  
104 Similarly to NL, a higher proportion of PI was found in malignant cells but in this case  
105 mainly in the luminal A subtype (**Figure 1C**). Moreover, while MDA-MB-231 and MCF-  
106 10A cells displayed similar levels of PE, the lowest levels of this class of lipids were  
107 observed in MCF-7 cells. Additionally, oPE and pPE were barely present in these cells  
108 (**Figure 1C**). Furthermore, considering all lipid species, MDA-MB-231 presented the  
109 highest levels of monounsaturated and polyunsaturated fatty acids (MUFAs and PUFAs,  
110 respectively) (**Figure 1D**), with special attention to arachidonic (ArA) and adrenic (AdrA)  
111 PUFAs (**Figure 1E and Supplementary Figure S1C**). Interestingly, MDA-MB-231 also  
112 presented the highest abundance of these acids esterified in PE (**Supplementary Figure**  
113 **S1D and S1E**). Worth of note that the non-tumorigenic cells displayed higher levels of  
114 CoQ<sub>10</sub>, compared to malignant cells (**Figure 1F**), suggesting that the better control of  
115 redox imbalance could play a role in the level of protection experienced by MCF-10  
116 cells. Indeed, CoQ<sub>10</sub> can trap lipophilic radicals and halt the propagation of phospholipid  
117 peroxidation<sup>18</sup>. These last observations led us to hypothesize whether ferroptosis, a  
118 form of regulated cell death (RCD), which is initiated by oxidative insults that occurs

119 mainly towards PUFA, as ARA or AdrA<sup>19</sup> (especially if they are esterified in PE<sup>20</sup>), would  
120 be a cell death mechanism induced by MB-PDT.

### 121 *MB-PDT induces ferroptosis in TNBC cells*

122 As a prooxidant treatment, MB-PDT presents the potential to induce lipid oxidation and  
123 cell membranes damage<sup>21</sup>. We hence investigated whether MB-PDT would lead to the  
124 accumulation of oxidized lipids and could induce ferroptosis in BC. As a first step, the  
125 presence of the key components of ferroptosis ACSL4 (acyl-CoA synthetase long-chain  
126 family member 4) and GPX4 (glutathione peroxidase 4) was evaluated in BC growing in  
127 basal conditions. Unlike MCF-7 cells, MCF-10A and MDA-MB-231 cells expressed ACSL4  
128 (**Supplementary Figure 2**). Moreover, the non-tumorigenic cells presented higher  
129 protein levels of GPX4, compared to the luminal A or the TNBC cell lines (**Supplementary**  
130 **Figure 2**). The second step was studying whether cells submitted to MB-PDT undergo  
131 lipid peroxidation by using BODIPY-C11, a fluorescent probe for lipid oxidation. MCF-  
132 10A and MDA-MB-231 cells showed increased lipid peroxidation after MB-PDT  
133 treatment, while MCF-7 cells presented no differences (**Figure 2A, B**). Additionally, since  
134 iron available in the labile iron pools (LIP) has already been reported for being more  
135 prone to participate in ferroptosis, LIPs were analysed in the three cell lines before MB  
136 photooxidation. The highest LIP levels were found in MDA-MB-231 cells (**Figure 2C**).  
137 Remarkably, these data revealed that these cell lines constitute three distinct cell  
138 models to explore the role of ferroptosis in the context of photooxidation: one that  
139 exhibits PUFA but also disposes high lipid detoxification capacity, like GXP4 and CoQ<sub>10</sub>,  
140 (MCF-10A); another that besides displaying high levels of GPX4, does not posses high  
141 abundance of PUFA nor CoQ<sub>10</sub> (MCF-7); and finally, the most aggressive cell line

142 containing a higher proportion of PUFA and LIP and a very low capacity to deal with lipid  
143 peroxidation due to the low levels of reduced glutathione (GSH)<sup>13</sup>, GPX4 and CoQ<sub>10</sub>  
144 (MDA-MB-231).

145 In order to investigate the role of ferroptosis in these cells submitted to photooxidation,  
146 GPX4 protein levels were evaluated after MB-PDT treatment. Moreover, cells were  
147 pretreated with the ferroptosis inhibitor ferrostatin-1 (Fer-1), followed by MB-PDT and  
148 determination of cell death percentage. Results showed that despite the fact that MB-  
149 PDT promoted the depletion of GPX4 protein levels in all cell lines tested (**Figure 2D,E**),  
150 only MDA-MB-231 cells were protected by Fer-1 against photooxidation-induced cell  
151 death (**Figure 2F-H**). These results are consistent with our data indicating that MDA-MB-  
152 231 could have very low capacity to cope with lipid peroxidation and consequently  
153 would be more susceptible to ferroptosis.

154 To test whether the presence of PUFAs was required to induce ferroptosis and hence  
155 increase MB-PDT cytotoxicity, we pre-incubated MCF-7 with arachidonic acid (ArA) and  
156 then submitted the cells to MB-PDT. MCF-7 pretreated with ArA underwent lipid  
157 peroxidation after MB-PDT (**Figure 2I, J**) and became more sensitive to photooxidation  
158 (**Figure 2K**). Moreover, MB-PDT was now able to induce ferroptosis because Fer-1  
159 significantly inhibited cell death (**Figure 2K**). These data demonstrated that lipid  
160 peroxidation was a cytotoxic insult triggered by MB-PDT and cells presenting low  
161 abundance of PUFAs were less affected. Furthermore, these results have indicated that  
162 in order to undergo ferroptosis in response to MB-PDT photooxidation, high levels of  
163 PUFA were required, as demonstrated for MDA-MB-231 and ArA-pretreated MCF-7  
164 cells.

165 *Non-tumorigenic cells are more prone to mount an efficient antioxidant response against*  
166 *MB-PDT*

167 In order to further understand the resistance of MB-PDT-induced cell death observed in  
168 non-tumorigenic cells, the basal levels of other key antioxidant-related proteins, such as  
169 NF-E2-related factor 2 (NRF2), glucose 6-phosphate dehydrogenase (G6PD), copper/zinc  
170 and manganese superoxide dismutases (SOD1 and SOD2), and glutathione reductase  
171 and synthetase (GR and GS) were analysed and compared. Luminal A tumor-derived  
172 cells displayed the highest basal protein levels of G6PD, SOD1, SOD2 (**Supplementary**  
173 **Figure 3A-F**). Interestingly, the expression of GS in both tumor cells was extremely low  
174 compared to MCF-10A cells (**Supplementary Figure 3A, G**). These data indicated that  
175 tumorigenic cells possess less capacity to synthesise new GSH molecules and that,  
176 among all the models tested, TNBC cells would be potentially more susceptible to pro-  
177 oxidative damage<sup>13</sup>.

178 To further explore the antioxidant response of these cell lines to MB-PDT, we analysed  
179 the protein levels of some of these sets of enzymes in cells submitted or not to  
180 photooxidation. Despite the lack of differences in basal NRF2's levels between cells  
181 (**Supplementary Figure 3A,E**), upon MB-PDT this transcription factor was significantly  
182 increased in MCF-10A, slightly increased in MCF-7 and not modulated in MDA-MB-231  
183 cells (**Figure 3A-C,D**). Intriguingly, NRF2 rise was accompanied by higher G6PD protein  
184 levels (**Figure 3A-C,E**) and activity (**Figure 3G-I**) only in the non-tumorigenic cells. While  
185 cellular levels of SOD1 significantly peaked at 3h after MB-PDT and then remained high  
186 up to the last time point in MCF-7 cells, a pronounced depletion of SOD1 protein was  
187 observed early in both MCF-10A and MDA-MB-231 cells (**Figure 3A-C,F**) submitted to



188 the treatment. These observations may indicate that cytosolic SOD could play a  
189 protective role in MCF-7 cells submitted to photooxidation, highlighting that a  
190 differential cellular response mechanism against MB-PDT has been triggered.

191 Altogether, these results allowed us to conclude that the non-tumorigenic cells were  
192 able to activate a proficient antioxidant response through the increase of G6PD, which  
193 in turn would lead to the higher production of NADPH that could then be used to  
194 regenerate GSH, as well as reduced CoQ<sub>10</sub>, contributing to maximize the detoxification  
195 process and thus minimize cell death.

#### 196 *MB-PDT can also trigger necroptosis*

197 In order to investigate whether necroptosis was a cell death mechanism activated by  
198 MB-PDT in BC, the basal protein levels of key components of this pathway, such as  
199 RIPK1, RIPK3 and MLKL (Receptor Interacting Protein Kinases-1 and -3, and Mixed  
200 Lineage Kinase domain-Like protein, respectively), were first checked. MCF-7 cells  
201 displayed the highest levels of all the proteins analysed (**Supplementary Figure 4A-D**).  
202 Activation of this pathway was next assessed by monitoring MLKL phosphorylation  
203 levels (pMLKL). Interestingly, while pMLKL levels increased in all cancer cells submitted  
204 to MB-PDT, no sign of necroptosis activation was observed in the non-tumorigenic cells  
205 (**Figure 4A-C**). The role of necroptosis in MD-PDT cell death was further investigated in  
206 BC pretreated with necrostatin-1 (Nec-1) or necrosulfonamide (NSA), RIPK1 and MLKL  
207 inhibitors respectively. Our data showed that only the tumorigenic cells were protected  
208 from MB-PDT effects in the presence of the necroptosis inhibitors Nec-1 or NSA (**Figure**  
209 **2D-F**). Moreover, the relevance of necroptosis as a cell death mechanism induced by  
210 MB-PDT in breast tumor cells was also confirmed by silencing the expression of RIPK3 or

211 MLKL (**Supplementary Figure 4E-H**). Altogether, these data indicated that MB-PDT is  
212 capable of activating necroptosis in both luminal A and TNBC cells. However, up to this  
213 point of the study, the cytotoxic mechanism triggered by MB-PDT in the non-  
214 tumorigenic cells was still not elucidated.

### 215 *MB-PDT induces lysosome damage*

216 Based on the fact that we had previously reported that MB was mainly accumulated in  
217 lysosomes<sup>13</sup>, the hypothesis that photoactive MB could be capable to damage lysosome  
218 membrane and thus induce lysosome-dependent cell death (LDCD) was raised and  
219 tested. The first evidence was obtained by assessing the cytosolic activity of the  
220 lysosomal cathepsin B. In fact, MB-PDT induced lysosomal membrane permeabilization  
221 (LMP) (**Figure 5A**). The involvement of LDCD mediating the PDT effects by inhibiting  
222 cathepsin B with a small molecule inhibitor (CA-074) was then investigated. Cell  
223 incubation with this inhibitor was able to significantly decrease MB-PDT cytotoxicity  
224 (**Figure 5B-D**). Moreover, the results have also indicated that LMP is a common event  
225 triggered by MB-PDT in all BC analysed. Additionally, since the levels of pMLKL were  
226 decreased upon cathepsin B inhibition, the results pointed at a yet undescribed possible  
227 cross-talk between LDCD and necroptosis induction after photooxidation (**Figure 5E,F**).

228 We demonstrated that MB-PDT trigger multiple RCD in BC by inducing modifications in  
229 lipid membranes. In malignant cells, our data pointed that LMP was followed by MLKL  
230 phosphorylation and necroptosis. In case of high PUFA-lipid content, in addition to  
231 LDCD and necroptosis, cells were also able to undergo ferroptosis, which was triggered  
232 via lipid peroxidation, GPX4 depletion and failure of the cell capacity to activate the cell  
233 responses involved in oxidative damage detoxification. Moreover, in these cells,

234 oxidative chain reactions could be facilitated and amplified by higher concentration of  
235 labile iron intracellular pool, resulting in a massive and faster cell death (**Figure 5G**).

## 236 Discussion

237 Non-tumorigenic human breast epithelial cells were more resistant to PDT than their  
238 malignant and more metastatic counterparts<sup>13</sup>. Up to date, there are no studies  
239 addressing a possible association of a defined lipid profile with aggressiveness and  
240 susceptibility to undergo different cell death subroutines upon massive oxidant species  
241 generation<sup>22,23</sup>. Therefore, the present study has focused on understanding the  
242 molecular pathways underlining these different cell behaviors upon photooxidative  
243 damage (**Figure 6**). We have demonstrated that MB-PDT can activate multiple cell death  
244 mechanisms, namely ferroptosis, necroptosis and LDCD. This study has also assessed  
245 the cellular makeups in lipid composition and antioxidant machinery, which underlie the  
246 unique capacity of the most aggressive breast cancer cells tested to undergo ferroptosis  
247 upon MB-PDT. Moreover, our data have further reinforced the potential of this therapy  
248 to present fewer side effects on non-cancerous breast tissue, by providing several  
249 evidences on how PhOxS triggered by MB-PDT has barely affected antioxidant capacity  
250 of non-tumorigenic breast cells to deal with oxidative damage (**Figure 6**).

251 By using high resolution lipidomics, we mapped the lipid content in three different BC  
252 models displaying different susceptibilities to PDT-induced photooxidative redox  
253 imbalance. In the recent years lipids have emerged as key regulators of cell fate<sup>24,25</sup>.  
254 Increasing amount of evidences have highlighted their functions as triggers, executors  
255 or modulators of plasma membrane components that act as platforms for RCD  
256 execution<sup>26</sup>. Lipids, displaying different susceptibilities to undergo chemical

257 modifications can execute their functions on cell death subroutines by modulating  
258 membrane physicochemical properties<sup>27,28</sup>. For example, exposure of lipids to sources  
259 of free radicals, molecular oxygen and redox-active metal ions, such as low-valent iron,  
260 results in lipid peroxidation<sup>29</sup>. Noteworthy, in the context of PDT the direct contact  
261 within lipid membranes and the excited triplet state of the PS molecule, during  
262 photosensitized oxidations, also results in membrane peroxidation<sup>8</sup>. We provided  
263 strong evidences of membrane lipid peroxidation in cells containing high proportion of  
264 PUFAs submitted to MB-PDT-induced photooxidation. The presence of methylene  
265 groups flanked by carbon-carbon double bonds make PUFAs particularly good  
266 substrates for oxidations<sup>30</sup>. Therefore, the subsequent accumulation of lipid  
267 peroxidation products culminates in the permeabilization of the membrane<sup>31</sup>.

268 Other groups have already correlated an increased abundance of PUFAs with  
269 ferroptosis induction<sup>20,32</sup>. Moreover, the mechanism of ferroptosis was identified as  
270 specifically dependent on intracellular iron availability and not on other metals<sup>33</sup>.

271 Herein, on one hand, it has been shown that highly aggressive breast cancer cells  
272 presented the highest PUFAs and LIP contents and consequently were the only cells  
273 undergoing ferroptosis upon MB-PDT. On the other hand, we were able to demonstrate  
274 that exogenous supplementation of ArA was sufficient to bypass the protective effect  
275 conferred by the lack of ACSL4 in the non-invasive MCF-7 cells submitted to MB-PDT.

276 ACSL4 is the acyl transferase that catalyzes the conversion of long-chain fatty acids,  
277 preferentially arachidonate and eicosapentaenoate, to their active form acyl-CoA in  
278 PUFA-containing lipid synthesis<sup>34,35</sup>. These results pointed PUFAs as key lipid modulators  
279 involved in the molecular mechanisms of MB-PDT cytotoxicity. Exogenous metabolites,

280 including lipids, have been reported to be potent modulators of cell function and fate  
281 and could conceivably be relevant in several contexts *in vivo*, especially for cells that can  
282 extract exogenous lipids directly from the bloodstream<sup>36,37</sup>. In healthy individuals,  
283 raising serum PUFA levels could provide a means to improve the lethality of existing  
284 pro-ferroptotic agents against cancer cells<sup>37</sup>. Moreover, our studies have suggested that  
285 the administration of exogenous PUFAs before the photooxidation could potentially  
286 help to improve the power of this therapy by tackling tumor cell death resistance to  
287 MB-PDT.

288 In physiological conditions, lipid peroxides are reduced to non-toxic lipid alcohols by  
289 GPX4, at the cost of the oxidation of two molecules of GSH per lipid molecule<sup>38</sup>.  
290 However, this enzyme is absent or inactive during ferroptosis, resulting into toxic lipid  
291 accumulation<sup>39,40</sup>. As a consequence, the inhibition of GPX4 or depletion of GSH has  
292 emerged as therapeutic strategies to induce cancer cell death<sup>41</sup>. We have previously  
293 shown that MB-PDT was able to deplete GSH levels in breast tumor cells<sup>9</sup>. Additionally,  
294 in the present study the levels of GPX4 were decreased in all BC tested upon  
295 photooxidation, underscoring MB-PDT as a potential ferroptosis inducer. This  
296 observation is consistent with the fact that sensitivity to GPX4 inhibitors varies greatly  
297 across cell lines and ferroptosis may have additional regulation mechanisms<sup>42</sup>. Indeed, a  
298 glutathione-independent regulation axis involving the ferroptosis suppressor protein 1  
299 (FSP1), previously called apoptosis-inducing factor mitochondrial 2 (AIFM2), was  
300 recently uncovered<sup>18,43</sup>. FSP1 acts as a NAD(P)H-oxidoreductase that reduces coenzyme  
301 Q-10 (CoQ<sub>10</sub>), which can, in turn, trap lipophilic radicals and halt the propagation of lipid  
302 peroxidation<sup>18,43</sup>. Interestingly, our results have shown that non-tumor breast cells

303 presented the highest abundance of CoQ<sub>10</sub> among the three cell lines and were able to  
304 survive despite undergoing lipid peroxidation and GPX4 depletion. CoQ<sub>10</sub> can be  
305 reduced in the presence of NADPH and breast non-tumorigenic cells were the only  
306 model where it was observed an increase of activity of a key enzyme for the generation  
307 of NADPH cellular supply, G6PD, upon MB-PDT. Therefore, one can speculate that the  
308 FSP1–CoQ<sub>10</sub>–NAD(P)H axis could be operating to suppress phospholipid peroxidation  
309 and ferroptosis after photooxidative damage in the non-tumorigenic breast cells. It is  
310 important to note that this particular effect could be associated with the low side  
311 effects of this therapy.

312 Previous results from our group have demonstrated the importance of optimizing  
313 fluence rates in order to provide exhaustion of the cell antioxidant responses to  
314 circumvent therapy resistance of breast tumors using MB-PDT<sup>9</sup>. We now observed that  
315 the basal levels of key antioxidant proteins were lower in TNBC cells, further extending  
316 the knowledge that these cells exhibit significant metabolic alterations compared to  
317 luminal tumors<sup>13,44</sup>. Moreover, our data indicated that despite the non-invasive MCF-7  
318 cells displayed high basal levels of most of the antioxidant proteins evaluated, they  
319 were not able to mount such an efficient antioxidant response against photooxidation  
320 when compared to the one displayed by the non-tumorigenic breast cell line, which  
321 were more resistant to PDT.

322 As a prooxidant multifaceted therapy, it is difficult to precisely address where the  
323 trigger of PDT will be. Since in general the first photoreaction will occur in the vicinity of  
324 where the PS presents the highest concentration<sup>45</sup>, determining its subcellular  
325 localization could give us a clue. We have previously shown that in these cell lines MB

326 accumulates preferentially in the lysosomes<sup>13</sup>. Several reports have suggested that  
327 lysosome integrity is critical to maintain cellular homeostasis, because it ensures the  
328 proper localization of lysosomal enzymes and organelle function. Upon damage,  
329 lysosomal content leaks into the cytoplasm as a consequence of lysosome membrane  
330 permeabilization (LMP)<sup>46</sup>. In the present study we identified the occurrence of MB-PDT-  
331 dependent LMP. In principle, this process should represent little danger, because most  
332 lysosomal proteases are inactive at neutral pH. However, some cathepsins, such as  
333 cathepsins B, D, and L, remain active at neutral pH and can trigger a cascade of events,  
334 including the proteolytic modification of molecules implicated in cell death pathways<sup>47</sup>.  
335 Therefore, LMP can be followed by a multi-pathway process that results in LDCD, which,  
336 in most cases, can be prevented by inhibiting lysosomal protease activity<sup>46,48</sup>.  
337 Interestingly, LDCD was the only PDT-induced process contributing to the low cell death  
338 observed in non-tumorigenic breast cells submitted to MB-PDT.

339 Cytosolic cathepsins usually lead to apoptotic RCD by catalyzing the proteolytic  
340 activation or inactivation of several substrates, including BAX and anti-apoptotic BCL2  
341 family members<sup>48</sup>. However, we have previously shown that apoptosis was not the  
342 main cell death mechanism activated in BC submitted to MB-PDT<sup>13</sup>. In line with this, it  
343 has been recently demonstrated, indeed, that LDCD does not necessarily manifest itself  
344 with an apoptotic morphotype and an intriguing connection is emerging between LMP,  
345 the adaptive responses to stress, and other RCD subroutines<sup>49,50</sup>. For example,  
346 lysosomes have an essential role in autophagy and cellular iron homeostasis, being a  
347 major source of free iron due to the degradation of ferritin in a process called  
348 ferritinophagy<sup>51-53</sup>. Thus, lysosomal damage could allow this metal to be more

349 bioavailable to peroxidation reactions. Therefore, upon lipid peroxidation and in the  
350 absence of a proper detoxifying response, as occurred in breast tumorigenic cells upon  
351 MB-PDT, LMP may facilitate catalysis of iron-dependent reactions and increase  
352 ferroptosis susceptibility.

353 Based on our data that ferroptosis only occurs in TNBC cells and that its inhibition did  
354 not completely rescue cells from death, we hypothesized that MB-PDT was activating  
355 more than one regulated necrotic pathway simultaneously. Intriguingly, we have also  
356 detected activation of necroptosis only in tumorigenic cells submitted to  
357 photooxidation damage. Necroptosis is triggered by perturbations of extracellular or  
358 intracellular homeostasis that critically depend on the kinase activities of RIPK1, at least  
359 in some settings, RIPK3, and consequent phosphorylation, oligomerization and  
360 migration of MLKL (mixed lineage kinase domain-like protein) to the plasma  
361 membrane<sup>3,48</sup>. MLKL oligomers form channels on the plasma membrane, leading to high  
362 osmotic pressure, water influx, release of intracellular components, and eventual  
363 plasma membrane rupture<sup>54</sup>. To undergo necroptosis, MLKL engagement requires the  
364 presence of specific lipids at the plasmatic membrane. Phosphatidyl inositol phosphates  
365 including, phosphatidylinositol-5-phosphate and phosphatidylinositol-4,5-bisphosphate  
366 have been described to function as lipid receptors of MLKL in the inner leaflet of the  
367 plasma membrane<sup>55-57</sup>. These lipids are products of kinases that can phosphorylate the  
368 3-, 4-, and 5-hydroxyl groups of the inositol head group of PI lipids<sup>58</sup>. Our study revealed  
369 that both breast cancer cell lines presented higher levels of overall PI, compared to the  
370 non-tumorigenic cells. Consistent with this observation, only breast cancer cells  
371 underwent MLKL phosphorylation and necroptosis. It is thus reasonable to suppose that



372 lipid composition of normal cells does not sustain the necroptosis membrane pore  
373 formation, also contributing to their resistance to photooxidation-induced cell death.

374 It has been previously shown by others that RIPK1 and RIPK3 can be degraded in  
375 lysosomes and that inhibition of lysosomal function, with LMP, leads to this kinases  
376 accumulation and necroptosis induction<sup>59,60</sup>, strengthening the possibility of a link  
377 between LMP and necroptosis. Indeed, we have shown that, in breast cancer cells  
378 submitted to MB-PDT, lysosomal cathepsin inhibition was able to suppress cell death  
379 and MLKL phosphorylation, providing a clear evidence of the existence of cross-talks  
380 between LDCD and necroptosis, triggered by MB-PDT. We suggest that, because as MB  
381 localizes mainly in lysosomes of these cells, LMP is an inevitable consequence of MB  
382 photoactivation, and thus may be driving the RCD events. The activation of different cell  
383 death subroutines will then depend on the availability of the required components of  
384 each pathway. We have described that different human breast epithelial cells, from  
385 non-tumorigenic to very aggressive malignant cells, display distinct structural and  
386 metabolic traits within different signaling pathways were activated upon MB-PDT. In  
387 this study, LMP appears as the common event, which was then followed by an  
388 antioxidant response (in non-tumorigenic cells), necroptosis (in non-invasive tumor  
389 cells) or both necroptosis and ferroptosis (in highly aggressive tumor cells).

390 Collectively, our data have provided molecular mechanisms behind a hitherto  
391 unexplored therapeutic approach, which have simultaneously activated alternative  
392 tumor regulated cell death pathways while preserving the integrity of most of the non-  
393 tumorigenic cells. This fact is of fundamental importance since despite all the recent  
394 technological improvements, breast cancer still has significantly impacts on global

395 health, being disease recurrence and metastasis the bottleneck for an effective clinical  
396 treatment<sup>2,3</sup>. This study contributes to a better understanding of breast cancer  
397 susceptibility to photooxidation-induced damage. Our results could provide the rational  
398 and know-how needed to maximize the therapeutic clinical application gain of MB-PDT.

## 399 **Materials and methods**

### 400 **Cell culture**

401 MCF-10A (ATCC CRL-10317™) cells were maintained in phenol red-free DMEM-F12  
402 (Sigma-Aldrich, St. Louis, MO, USA) supplemented with 5% heat-inactivated horse  
403 serum (Thermo Scientific, Waltham, MA, USA), insulin (10 µg/mL; Sigma-Aldrich),  
404 cortisol (500 ng/mL; Sigma-Aldrich), cholera enterotoxin (100 ng/mL; Sigma-Aldrich),  
405 and epidermal growth factor (20 ng/mL; Sigma-Aldrich). MCF-7 (ATCC HTB-22™) cells  
406 were maintained in phenol red-free DMEM-F12 (Sigma-Aldrich) with 10% heat-  
407 inactivated FBS (Vitrocell Embriolife, Campinas, Sao Paulo, Brazil). MDA-MB-231 (ATCC  
408 HTB-26™) cells were cultured in phenol red-free RPMI 1640 (Sigma-Aldrich) with 10%  
409 heat-inactivated FBS (Vitrocell Embriolife). All cultures were maintained at 37°C under  
410 water-saturated atmosphere containing 5% CO<sub>2</sub>.

### 411 **Photodynamic treatment (MB-PDT)**

412 An aqueous solution containing of Methylene blue (MB, Labsynth Products, São Paulo,  
413 Brazil) was used as PS. Cells were seeded at 30.000 cells.cm<sup>-2</sup> and after 24 h they were  
414 incubated for 2 h with 20 µM of MB solution, in phenol red-free medium and  
415 maintained in these conditions during both irradiation and post-treatment time. All  
416 assays were performed with a reduction of 75% of medium supplements. The whole  
417 microplate was irradiated from the top with a light-emitting diode (LED) array, with

418 maximum emission wavelength at 640 nm. The irradiation time was 16 min with a total  
419 light dose was  $4.5 \text{ J.cm}^{-2}$  (fluence rate of  $4.7 \text{ mW.cm}^{-2}$ ). Control experiments, such as  
420 cells exposure or not to the PS or exposure or not to light were performed. For cell  
421 death inhibition assays, inhibitors were pre-incubated with MB solution 2 h before  
422 irradiation: Fer-1 (Cayman Chemical, Ann Arbor, Michigan, EUA,  $1 \mu\text{M}$ ); Nec-1 (Sigma-  
423 Aldrich,  $10 \mu\text{M}$ ); NSA (abcam, Cambridge, United Kingdom,  $5 \mu\text{M}$ ); or CA-074 (Millipore,  
424 Burlington, Massachusetts, EUA,  $400 \text{ nM}$ ). Pretreatment with ArA (Sigma-Aldrich,  $24$   
425  $\mu\text{M}$ ) was performed 16 h before MB incubation.

#### 426 **Cell death evaluation**

427 After treatments cells were stained with the DNA-binding dyes Propidium iodide (PI,  
428 Sigma-Aldrich) and Hoechst 33342 (HO, Sigma-Aldrich) for 10 min. Following incubation,  
429 the percentage of viable and dead cells was determined using an inverted fluorescence  
430 microscope (Nikon Eclipse Ti, Kyoto, Japan) with 20x of magnification. Fluorescence of  
431 labelled cells was detected using laser 461 nm and 545 nm for excitation of HO and PI  
432 respectively. The cultures were evaluated according to: the total number of cells,  
433 determined by counting the nuclei stained with HO; and the number of dead cells  
434 determined by the number of nuclei stained with PI. A minimum of 500 cells was  
435 counted in each experimental condition. Results were expressed as percentage of dead  
436 cells.

#### 437 **Transient oligonucleotide transfection**

438 The transfection was performed 24 h after seeding of  $1.5 \times 10^4 \text{ cells.cm}^{-2}$ . The lipid  
439 carrier Lipofectamine RNAiMAX (Life Technologies, Carlsbad, CA, USA) and the Silencer®  
440 Select pre-designed siRNA (Life Technologies) for human RIPK3

441 (GGCAAGUCUGGAUAACGAAtt) or for human MLKL (CCCGUUUCAAGGUGAAGAAtt) were  
442 used. “AllStars negative control siRNA” (Qiagen, Venlo, Netherlands) was used as a  
443 negative siRNA control of scrambled sequence (siControl). Lipid-RNA complexes were  
444 formed in Opti-MEM (Invitrogen) in a proportion of 0.6  $\mu$ L of Lipofectamine to 0.45  $\mu$ L  
445 of 20  $\mu$ M siRNA, at room temperature for 20 min and were further added to cells in  
446 antibiotic-free medium to reach a final volume of 300  $\mu$ L (in a 24-well plate) for  
447 overnight transfection. Cells were maintained in culture for a 24 h recovery period  
448 before experiments were carried out. The efficiency of transfection/silencing was  
449 validated by Western blot.

#### 450 **Western blots**

451 Cells were lysed in RIPA Buffer (Sigma-Aldrich) containing protease inhibitor (Roche,  
452 Basel, Switzerland) and phosphatase inhibitor (Sigma-Aldrich) cocktails. 30  $\mu$ g protein  
453 were loaded on a 12% denaturing gel and proteins were separated by SDS-PAGE.  
454 Proteins were transferred by tank blot onto a PVDF membrane that was subsequently  
455 blocked in a solution containing 5% Blocking Buffer (Life Technologies) and 5% BSA (1:1)  
456 at 4°C overnight. Primary antibodies were diluted in a solution of 5% BSA in PBS (**Table**  
457 **1**) and were incubated overnight at 4°C. Membranes were washed three times in PBS-  
458 Tween (0.1%) and then incubated at RT for 1h with HRP-labeled secondary antibodies,  
459 diluted in a solution of 1% BSA in PBS. The protein-antibody complex was visualized by  
460 using enhanced chemiluminescence (Millipore Corporation, Billerica, MA, USA). Images  
461 were acquired using Uvitec Image System (Cleaver Scientific Limited, Cambridge, UK).  
462 Quantitative densitometry was carried out using the ImageJ software (National  
463 Institutes of Health). The volume density of the chemiluminescent bands was calculated  
464 as integrated optical density  $\times$  mm<sup>2</sup> using ImageJ Fiji.

#### 465 **Cathepsin activity assay**

466 Cells were washed with phosphate buffer (PBSA: NaCl 137 mM, KCl 2.7 mM, Na<sub>2</sub>HPO<sub>4</sub>  
467 10 mM, KH<sub>2</sub>PO<sub>4</sub> 1.8 mM, pH 7.2) and detached from the plate using trypsin solution  
468 (0.5% p/v). The cells were then centrifuged at 800 x g for 2 minutes. Cell pellets were  
469 washed with PBSA and resuspended in 2 mL PBSA. The number of cells was counting in  
470 a hemocytometer. Samples were then homogenized in syringes with insulin needle 10  
471 times, and centrifuged at 4°C, 700 x g for 10 minutes. The supernatants were collected  
472 and centrifuged at 4°C, 25000 x g for 2 hours for cytosol and organelles fractionation.  
473 The supernatants (cytosolic fraction) were used in cathepsin-B/L kinetics assays using Z-  
474 FR-MCA as substrate (10 µM) in 100 mM citrate phosphate buffer, pH 6. Protease  
475 activity was evaluated at an excitation wavelength of 380 nm and an emission  
476 wavelength of 460 nm using a 96-well plate in a spectrofluorometer (SpectraMAX M2,  
477 Molecular Devices, Sunnyvale, CA, USA). Fluorescence intensity values were collected  
478 every 5-minute intervals for 1 hour. Activity units were calculated as: [relative  
479 fluorescence units (RFU)/min]/number of cells. Each experiment was performed in  
480 duplicate. At least three independent experiments were performed for each cell type  
481 and condition.

#### 482 **G6PD activity assay**

483 The determination of G6PD activity was performed as already described<sup>61</sup>. Reaction  
484 medium was incubated at 37°C. Fluorescence intensity values were collected every 2  
485 min during 1h at 500 nm in a SpectraMax M2 microplate reader (Molecular Devices).  
486 Activity units were calculated as: (RFU/min)/number of cells. Each experiment was  
487 performed in duplicates and at least three independent experiments were performed  
488 for each cell type and condition.

#### 489 Lipid peroxidation analysis

490 After irradiation, the cells were incubated with 1  $\mu$ M BODIPY C11 at 37°C during 20 min.  
491 The probe was then removed and 1 mL of fresh medium without serum and phenol red  
492 was added. Cells were imaged using a fully motorized Leica DMI8 widefield microscope  
493 (from Leica Microsystems) using the FITC and Texas Red filter sets and a 20x objective.  
494 Imaging was performed on two independent biological replicates. In each independent  
495 experiment at least 4 different images (100 cells) per condition were analysed. All  
496 imaging acquisition parameters were kept constant for each experiment. Images were  
497 quantified using ImageJ Fiji and quantified as follows. Cell outlines were free-handed  
498 drawn on the bright field channel to generate a cell selection mask for quantifying the  
499 fluorescence intensity in the green and red channels. Oxidation of BODIPY C11 581/591  
500 was calculated as the ratio of the green (fluorescence emission of the oxidized probe)/  
501 red fluorescence mean intensity (fluorescence emission of reduced probe) within the  
502 cell outlines.

#### 503 Lipidomic analysis

504 Non-targeted lipidomic analysis of major lipids was performed by reversed-phase ultra-  
505 high-performance liquid chromatography (RP-UHPLC) coupled to electrospray  
506 ionization time-of-flight mass spectrometry (ESI-TOFMS). Prior to lipid extraction, a  
507 mixture of lipid internal standards (**Table 2**) was added to the samples for semi-  
508 quantification of reported lipid molecular species. Lipid extraction was performed  
509 according to a method adapted from<sup>62</sup>. 500.000 cells were homogenized in 500  $\mu$ L of 50  
510 mM phosphate buffer (pH 7.4) containing 100  $\mu$ M deferoxamine mesylate. This  
511 homogenate was mixed with 400  $\mu$ L of ice-cold methanol, containing 100  $\mu$ M of  
512 butylated hydroxytoluene (BHT), and 100  $\mu$ L of internal standards (10  $\mu$ g/mL). 2 mL of

513 chloroform: ethyl acetate (4:1) were added to the mixture, followed by vortexing during  
514 30 s. After centrifugation at 1,500 x g for 2 min at 4°C, the lower phase containing total  
515 lipid extracts (TLE) was transferred to a new tube and dried under N<sub>2</sub> gas<sup>63</sup>. Dried TLE  
516 were dissolved in 100 µL of isopropanol and the UHPLC injection volume was set at 2  
517 µL. The separation conditions of mass spectrometry analysis were performed as  
518 previously described. The MS/MS data were analysed with PeakView®, and lipid  
519 molecular species were identified by an in-house manufactured Excel-based macro.  
520 Lipids were named according to the LIPID MAPS® Structure Database (LMSD)  
521 guidelines<sup>64,65</sup>. The lipid quantification was performed with MultiQuant®, in which peak  
522 areas of precursor ions were normalized to those of the internal standards. Final data  
523 were expressed as mass of lipid species per mass of total proteins, determined by BCA  
524 Protein Assay Kit (Thermo) as manufacturer instructions. Lipids were annotated  
525 according to their lipid subclass. Individual lipids were also grouped as the total number  
526 of double bonds in: saturated (no double bounds); monounsaturated (presence of one  
527 double bound) or polyunsaturated (presence of more than one double bound).

#### 528 **Labile iron pool (LIP) measurement**

529 LIP was given as sum of the concentrations of iron ([Fe]) and calcein-bound Fe ([CA-Fe]),  
530 normalized to the total intracellular calcein ([CA]t), whereby LIPN = LIP/[CA]t. We  
531 followed the rationale for fluorescence determination of LIP developed by<sup>66</sup> with minor  
532 modifications. Cells, at a density of 1-2 x 10<sup>6</sup> cells/mL, were incubated with 0.25 µM of  
533 calcein acetoxymethyl ester (CA-AM) for 5 min at 37°C in bicarbonate-free and serum-  
534 free growth medium containing 1 mg/mL BSA and 20 mM Hepes (Sigma-Aldrich), pH  
535 7.3. After incubation, cells were washed of excess CA-AM with medium without CA-AM  
536 2 times, and resuspended in warm HBS (Hepes 20 mM, NaCl 150 mM, pH 7.3). The

537 number of cells ( $N_c$ ) was measured by counting in a hemocytometer. The cell  
538 suspension was transferred to a 24-well microplate and fluorescence of calcein (CA)-  
539 loaded cells ( $F$ ) was monitored at an excitation of 488 nm and emission of 517 nm using  
540 a microplate reader (Infinite M200 plate reader-Tecan, Männedorf, Switzerland), with  
541 gently orbital shaking before each measurement (2 seconds, 4 mm amplitude). After  
542 signal stabilization (2-5 minutes) and reaching a given fluorescence intensity ( $F$ ), the  
543 iron chelator SIH (Salicylaldehyde Isonicotinoyl Hydrazine, 100  $\mu$ M final) was added,  
544 causing a rise in fluorescence signal ( $F_c$ ). The rise in fluorescence elicited by SIH was  
545 given as the fractional change ( $\Delta F$ ), using a normalized fluorescence scale  $FN = F/F_c$ .  
546 Next, the CA concentration in the cell suspension ( $[CA]_{susp}$ ) was determined from a  
547 calibration curve obtained by adding CA standards (in 1 nM steps) to the CA-loaded cells  
548 suspension supplemented with SIH. The  $[CA]_t$  was calculated from the relationship  $[CA]_t$   
549 =  $[CA]_{susp}/N_c$ . The  $[CA-Fe]$  was obtained from the relationship  $[CA-Fe] = \Delta F * [CA]_t$ .  $[Fe]$   
550 was calculated from CA-Fe dissociation constant:  $K_d = [CA]_t * [Fe] / [CA-Fe]$ , using the  
551 experimental values of  $[CA-Fe]$  and  $[CA]_t$  and the  $K_d$  in cells value of (0.22) obtained in  
552 the original paper<sup>66</sup>. CA, CA-AM and SIH were generous gifts from Dr. Breno Pannia  
553 Espósito, Chemistry Institute of the University of São Paulo, Brazil.

#### 554 **Statistical analysis**

555 All results were analysed for Gaussian distribution and passed the normality test. The  
556 statistical differences between group means were tested by One-way ANOVA followed  
557 by Tukey's post-test for multiple comparisons or by Two-way ANOVA followed by  
558 Bonferroni's post-test for multiple comparisons. For PCA in lipidomic studies, statistical  
559 analysis was performed with MetaboAnalyst website. A value of  $p < 0.05$  was considered  
560 as statistically significant in all analysis.



561 All data presented in this manuscript are available upon request to the authors.

## 562 Acknowledgements

563 This research was funded by the Brazilian agencies FAPESP (grants 2019/09517-2,  
564 2019/05026-4, 2017/18922-2, 2017/03618-6, 2017/13804-1, 2016/04676-7,  
565 2015/02654-3, 2013/07937-8), CAPES and CNPq. We are very grateful to prof. Dr.  
566 Breno Pannia Espósito, from IQ-USP, for the kind help and practical suggestions for LIP  
567 measurement. We also kindly acknowledge the support of the lab technicians Marcelo  
568 S. Nunes and Sandra R. Souza, and the members of LFPI laboratory, from IQ-USP,  
569 specially Dr. Helena C. Junqueira and Dr. Felipe G. Ravagnani.

570 **Conflict of Interest:** The authors declare no potential conflicts of interest.

## 571 References

- 572 1 Tong CWS, Wu M, Cho WCS, To KKW. Recent advances in the treatment of breast  
573 cancer. *Front Oncol* 2018; **8**. doi:10.3389/fonc.2018.00227.
- 574 2 Harbeck N, Penault-Llorca F, Cortes J, Gnant M, Houssami N, Poortmans P *et al*.  
575 *Breast cancer*. 2019 doi:10.1038/s41572-019-0111-2.
- 576 3 Yu Z, Li Q, Wang J, Yu Y, Wang Y, Zhou Q *et al*. Reactive Oxygen Species-Related  
577 Nanoparticle Toxicity in the Biomedical Field. *Nanoscale Res Lett* 2020; **15**: 115.  
578 doi:10.1186/s11671-020-03344-7.
- 579 4 Ferroni C, Del Rio A, Martini C, Manoni E, Varchi G. Light-Induced Therapies for  
580 Prostate Cancer Treatment. *Front Chem* 2019; **7**. doi:10.3389/fchem.2019.00719.
- 581 5 Agostinis P, Berg K, Cengel KA, Foster TH, Girotti AW, Gollnick SO *et al*.  
582 Photodynamic therapy of cancer: an update. *CA Cancer J Clin* 2011; **61**: 250–81.  
583 doi:10.3322/caac.20114.
- 584 6 Sies H, Berndt C, Jones DP. Oxidative Stress. *Annu Rev Biochem* 2017; **86**: 715–  
585 748. doi:10.1146/annurev-biochem-061516-045037.
- 586 7 Bacellar IOL, Pavani C, Sales EM, Itri R, Wainwright M, Baptista MS. Membrane  
587 damage efficiency of phenothiazinium photosensitizers. *Photochem Photobiol*  
588 2014; **90**: 801–13. doi:10.1111/php.12264.

- 589 8 Bacellar IOL, Oliveira MC, Dantas LS, Costa EB, Junqueira HC, Martins WK *et al.*  
590 Photosensitized Membrane Permeabilization Requires Contact-Dependent  
591 Reactions between Photosensitizer and Lipids. *J Am Chem Soc* 2018; **140**: 9606–  
592 9615. doi:10.1021/jacs.8b05014.
- 593 9 Dos Santos AF, de Almeida DRQ, Terra LF, Wailemann RAM, Gomes VM, Arini GS  
594 *et al.* Fluence Rate Determines PDT Efficiency in Breast Cancer Cells Displaying  
595 Different GSH Levels. *Photochem Photobiol* 2019. doi:10.1111/php.13182.
- 596 10 Angell-Petersen E, Spetalen S, Madsen SJ, Sun C-H, Peng Q, Carper SW *et al.*  
597 Influence of light fluence rate on the effects of photodynamic therapy in an  
598 orthotopic rat glioma model. *J Neurosurg* 2006; **104**: 109–17.  
599 doi:10.3171/jns.2006.104.1.109.
- 600 11 Henderson BW, Busch TM, Snyder JW. Fluence rate as a modulator of PDT  
601 mechanisms. *Lasers Surg Med* 2006; **38**: 489–93. doi:10.1002/lsm.20327.
- 602 12 Grossman CE, Carter SL, Czupryna J, Wang L, Putt ME, Busch TM. Fluence Rate  
603 Differences in Photodynamic Therapy Efficacy and Activation of Epidermal  
604 Growth Factor Receptor after Treatment of the Tumor-Involved Murine Thoracic  
605 Cavity. *Int J Mol Sci* 2016; **17**: 1–14. doi:10.3390/ijms17010101.
- 606 13 Dos Santos AF, Terra LF, Wailemann RAM, Oliveira TC, Gomes VDM, Mineiro MF  
607 *et al.* Methylene blue photodynamic therapy induces selective and massive cell  
608 death in human breast cancer cells. *BMC Cancer* 2017; **17**: 194.  
609 doi:10.1186/s12885-017-3179-7.
- 610 14 Eckhardt BL, Francis P a., Parker BS, Anderson RL. Strategies for the discovery and  
611 development of therapies for metastatic breast cancer. *Nat Rev Drug Discov*  
612 2012; **11**: 479–497. doi:10.1038/nrd2372.
- 613 15 Dai X, Cheng H, Bai Z, Li J. Breast cancer cell line classification and Its relevance  
614 with breast tumor subtyping. *J. Cancer*. 2017. doi:10.7150/jca.18457.
- 615 16 Soule HD, Maloney TM, Wolman SR, Peterson WD, Brenz R, McGrath CM *et al.*  
616 Isolation and characterization of a spontaneously immortalized human breast  
617 epithelial cell line, MCF-10. *Cancer Res* 1990; **50**: 6075–86.
- 618 17 Oliveira CS, Turchiello R, Kowaltowski AJ, Indig GL, Baptista MS. Major  
619 determinants of photoinduced cell death: Subcellular localization versus  
620 photosensitization efficiency. *Free Radic Biol Med* 2011; **51**: 824–33.  
621 doi:10.1016/j.freeradbiomed.2011.05.023.
- 622 18 Doll S, Freitas FP, Shah R, Aldrovandi M, da Silva MC, Ingold I *et al.* FSP1 is a  
623 glutathione-independent ferroptosis suppressor. *Nature* 2019; **575**: 693–698.  
624 doi:10.1038/s41586-019-1707-0.
- 625 19 Yang WS, Kim KJ, Gaschler MM, Patel M, Shchepinov MS, Stockwell BR.  
626 Peroxidation of polyunsaturated fatty acids by lipoxygenases drives ferroptosis.

- 627 *Proc Natl Acad Sci* 2016. doi:10.1073/pnas.1603244113.
- 628 20 Kagan VE, Mao G, Qu F, Angeli JPF, Doll S, Croix CS *et al.* Oxidized arachidonic and  
629 adrenergic PEs navigate cells to ferroptosis. *Nat Chem Biol* 2017; **13**: 81–90.  
630 doi:10.1038/nchembio.2238.
- 631 21 Tasso TT, Schlothauer JC, Junqueira HC, Matias TA, Araki K, Liandra-Salvador É *et al.*  
632 Photobleaching Efficiency Parallels the Enhancement of Membrane Damage  
633 for Porphyrazine Photosensitizers. *J Am Chem Soc* 2019.  
634 doi:10.1021/jacs.9b05991.
- 635 22 Eiriksson FF, Nøhr MK, Costa M, Bödvarsdóttir SK, Ögmundsdóttir HM,  
636 Thorsteinsdóttir M. Lipidomic study of cell lines reveals differences between  
637 breast cancer subtypes. *PLoS One* 2020; **15**: 1–22.  
638 doi:10.1371/journal.pone.0231289.
- 639 23 Nishida-Aoki N, Izumi Y, Takeda H, Takahashi M, Ochiya T, Bamba T. Lipidomic  
640 Analysis of Cells and Extracellular Vesicles from High- and Low-Metastatic Triple-  
641 Negative Breast Cancer. *Metabolites* 2020; **10**. doi:10.3390/metabo10020067.
- 642 24 Magtanong L, Ko PJ, Dixon SJ. Emerging roles for lipids in non-apoptotic cell  
643 death. *Cell Death Differ* 2016; **23**: 1099–109. doi:10.1038/cdd.2016.25.
- 644 25 Van Meer G, Voelker DR, Feigenson GW. Membrane lipids: Where they are and  
645 how they behave. *Nat Rev Mol Cell Biol* 2008; **9**: 112–124. doi:10.1038/nrm2330.
- 646 26 Parisi LR, Morrow LM, Visser MB, Atilla-Gokcumen GE. Turning the Spotlight on  
647 Lipids in Non-Apoptotic Cell Death. *ACS Chem Biol* 2018; **13**: 506–515.  
648 doi:10.1021/acscchembio.7b01082.
- 649 27 Harayama T, Riezman H. Understanding the diversity of membrane lipid  
650 composition. *Nat Rev Mol Cell Biol* 2018; **19**: 281–296.  
651 doi:10.1038/nrm.2017.138.
- 652 28 Tsubone TM, Junqueira HC, Baptista MS, Itri R. Contrasting roles of oxidized lipids  
653 in modulating membrane microdomains. *Biochim Biophys Acta Biomembr* 2019;  
654 **1861**: 660–669. doi:10.1016/j.bbamem.2018.12.017.
- 655 29 Yin H, Xu L, Porter NA. Free radical lipid peroxidation: mechanisms and analysis.  
656 *Chem Rev* 2011; **111**: 5944–72. doi:10.1021/cr200084z.
- 657 30 Conrad M, Pratt DA. The chemical basis of ferroptosis. *Nat Chem Biol* 2019; **15**:  
658 1137–1147. doi:10.1038/s41589-019-0408-1.
- 659 31 Stockwell BR, Friedmann Angeli JP, Bayir H, Bush AI, Conrad M, Dixon SJ *et al.*  
660 Ferroptosis: A Regulated Cell Death Nexus Linking Metabolism, Redox Biology,  
661 and Disease. *Cell*. 2017. doi:10.1016/j.cell.2017.09.021.
- 662 32 Doll S, Proneth B, Tyurina YY, Panzilius E, Kobayashi S, Ingold I *et al.* ACSL4  
663 dictates ferroptosis sensitivity by shaping cellular lipid composition. *Nat Chem*

- 664 *Biol* 2017; **13**: 91–98. doi:10.1038/nchembio.2239.
- 665 33 Dixon SJ, Lemberg KM, Lamprecht MR, Skouta R, Zaitsev EM, Gleason CE *et al.*  
666 Ferroptosis : An Iron-Dependent Form of Nonapoptotic Cell Death. *Cell* 2012;  
667 **149**: 1060–1072. doi:10.1016/j.cell.2012.03.042.
- 668 34 Golej DL, Askari B, Kramer F, Barnhart S, Vivekanandan-Giri A, Pennathur S *et al.*  
669 Long-chain acyl-CoA synthetase 4 modulates prostaglandin E<sub>2</sub> release from  
670 human arterial smooth muscle cells. *J Lipid Res* 2011; **52**: 782–93.  
671 doi:10.1194/jlr.M013292.
- 672 35 Ohkuni A, Ohno Y, Kihara A. Identification of acyl-CoA synthetases involved in the  
673 mammalian sphingosine 1-phosphate metabolic pathway. *Biochem Biophys Res*  
674 *Commun* 2013; **442**: 195–201. doi:10.1016/j.bbrc.2013.11.036.
- 675 36 Calder PC. Functional Roles of Fatty Acids and Their Effects on Human Health. *J*  
676 *Parenter Enter Nutr* 2015; **39**: 18S–32S. doi:10.1177/0148607115595980.
- 677 37 Magtanong L, Ko P-J, To M, Cao JY, Forcina GC, Tarangelo A *et al.* Exogenous  
678 Monounsaturated Fatty Acids Promote a Ferroptosis-Resistant Cell State. *Cell*  
679 *Chem Biol* 2019; **26**: 420–432.e9. doi:10.1016/j.chembiol.2018.11.016.
- 680 38 Brigelius-flohé R, Maiorino M. Biochimica et Biophysica Acta Glutathione  
681 peroxidases. *BBA - Gen Subj* 2013; **1830**: 3289–3303.  
682 doi:10.1016/j.bbagen.2012.11.020.
- 683 39 Yang WS, SriRamaratnam R, Welsch ME, Shimada K, Skouta R, Viswanathan VS *et*  
684 *al.* Regulation of ferroptotic cancer cell death by GPX4. *Cell* 2014; **156**: 317–331.  
685 doi:10.1016/j.cell.2013.12.010.
- 686 40 Conrad M, Friedmann Angeli JP. Glutathione Peroxidases. In: *Comprehensive*  
687 *Toxicology: Third Edition*. 2017 doi:10.1016/B978-0-12-801238-3.95621-6.
- 688 41 Seibt TM, Proneth B, Conrad M. Role of GPX4 in ferroptosis and its  
689 pharmacological implication. *Free Radic Biol Med* 2019; **133**: 144–152.  
690 doi:10.1016/j.freeradbiomed.2018.09.014.
- 691 42 Zou Y, Palte MJ, Deik AA, Li H, Eaton JK, Wang W *et al.* A GPX4-dependent cancer  
692 cell state underlies the clear-cell morphology and confers sensitivity to  
693 ferroptosis. *Nat Commun* 2019; **10**: 1617. doi:10.1038/s41467-019-09277-9.
- 694 43 Bersuker K, Hendricks JM, Li Z, Magtanong L, Ford B, Tang PH *et al.* The CoQ  
695 oxidoreductase FSP1 acts parallel to GPX4 to inhibit ferroptosis. *Nature* 2019;  
696 **575**: 688–692. doi:10.1038/s41586-019-1705-2.
- 697 44 Pelicano H, Zhang W, Liu J, Hammoudi N, Dai J, Xu R-H *et al.* Mitochondrial  
698 dysfunction in some triple-negative breast cancer cell lines: role of mTOR  
699 pathway and therapeutic potential. *Breast Cancer Res* 2014; **16**: 434.  
700 doi:10.1186/s13058-014-0434-6.

- 701 45 Tsubone TM, Martins WK, Pavani C, Junqueira HC, Itri R, Baptista MS. Enhanced  
702 efficiency of cell death by lysosome-specific photodamage. *Sci Rep* 2017; **7**: 6734.  
703 doi:10.1038/s41598-017-06788-7.
- 704 46 Serrano-Puebla A, Boya P. Lysosomal membrane permeabilization as a cell death  
705 mechanism in cancer cells. *Biochem Soc Trans* 2018; **46**: 207–215.  
706 doi:10.1042/BST20170130.
- 707 47 Boya P, Kroemer G. Lysosomal membrane permeabilization in cell death.  
708 *Oncogene* 2008; **27**: 6434–51. doi:10.1038/onc.2008.310.
- 709 48 Galluzzi L, Vitale I, Aaronson SA, Abrams JM, Adam D, Agostinis P *et al.* Molecular  
710 mechanisms of cell death: Recommendations of the Nomenclature Committee  
711 on Cell Death 2018. *Cell Death Differ* 2018; **25**: 486–541. doi:10.1038/s41418-  
712 017-0012-4.
- 713 49 Berghe T Vanden, Linkermann A, Jouan-Lanhouet S, Walczak H, Vandenabeele P.  
714 Regulated necrosis: the expanding network of non-apoptotic cell death  
715 pathways. *Nat Rev Mol Cell Biol* 2014; **15**: 135–147. doi:10.1038/nrm3737.
- 716 50 Nagakannan P, Tabeshmehr P, Eftekharpour E. Oxidative damage of lysosomes in  
717 regulated cell death systems: Pathophysiology and pharmacologic interventions.  
718 *Free Radic Biol Med* 2020. doi:10.1016/j.freeradbiomed.2020.04.001.
- 719 51 Weber RA, Yen FS, Nicholson SPV, Alwaseem H, Bayraktar EC, Alam M *et al.*  
720 Maintaining Iron Homeostasis Is the Key Role of Lysosomal Acidity for Cell  
721 Proliferation. *Mol Cell* 2020; **77**: 645–655.e7. doi:10.1016/j.molcel.2020.01.003.
- 722 52 Bogdan AR, Miyazawa M, Hashimoto K, Tsuji Y. Regulators of Iron Homeostasis:  
723 New Players in Metabolism, Cell Death, and Disease. *Trends Biochem Sci* 2016;  
724 **41**: 274–286. doi:10.1016/j.tibs.2015.11.012.
- 725 53 Sui S, Zhang J, Xu S, Wang Q, Wang P, Pang D. Ferritinophagy is required for the  
726 induction of ferroptosis by the bromodomain protein BRD4 inhibitor (+)-JQ1 in  
727 cancer cells. *Cell Death Dis* 2019; **10**. doi:10.1038/s41419-019-1564-7.
- 728 54 Gong YN, Guy C, Olauson H, Becker JU, Yang M, Fitzgerald P *et al.* ESCRT-III Acts  
729 Downstream of MLKL to Regulate Necroptotic Cell Death and Its Consequences.  
730 *Cell* 2017. doi:10.1016/j.cell.2017.03.020.
- 731 55 Dondelinger Y, Declercq W, Montessuit S, Roelandt R, Goncalves A, Bruggeman I  
732 *et al.* MLKL Compromises Plasma Membrane Integrity by Binding to  
733 Phosphatidylinositol Phosphates. *Cell Rep* 2014.  
734 doi:10.1016/j.celrep.2014.04.026.
- 735 56 Quarato G, Guy CS, Grace CR, Llambi F, Nourse A, Rodriguez DA *et al.* Sequential  
736 Engagement of Distinct MLKL Phosphatidylinositol-Binding Sites Executes  
737 Necroptosis. *Mol Cell* 2016; **61**: 589–601. doi:10.1016/j.molcel.2016.01.011.

- 738 57 Dovey CM, Diep J, Clarke BP, Hale AT, McNamara DE, Guo H *et al.* MLKL Requires  
739 the Inositol Phosphate Code to Execute Necroptosis. *Mol Cell* 2018; **70**: 936–  
740 948.e7. doi:10.1016/j.molcel.2018.05.010.
- 741 58 Schink KO, Tan K-W, Stenmark H. Phosphoinositides in Control of Membrane  
742 Dynamics. *Annu Rev Cell Dev Biol* 2016; **32**: 143–171. doi:10.1146/annurev-  
743 cellbio-111315-125349.
- 744 59 Yashin D V., Romanova EA, Ivanova OK, Sashchenko LP. The Tag7-Hsp70 cytotoxic  
745 complex induces tumor cell necroptosis via permeabilisation of lysosomes and  
746 mitochondria. *Biochimie* 2016; **123**: 32–36. doi:10.1016/j.biochi.2016.01.007.
- 747 60 Liu S, Li Y, Choi HMC, Sarkar C, Koh EY, Wu J *et al.* Lysosomal damage after spinal  
748 cord injury causes accumulation of RIPK1 and RIPK3 proteins and potentiation of  
749 necroptosis. *Cell Death Dis* 2018; **9**: 476. doi:10.1038/s41419-018-0469-1.
- 750 61 Terra LF, Wailemann RAM, Dos Santos AF, Gomes VM, Silva RP, Laporte A *et al.*  
751 Heat shock protein B1 is a key mediator of prolactin-induced beta-cell  
752 cytoprotection against oxidative stress. *Free Radic Biol Med* 2019; **134**: 394–405.  
753 doi:10.1016/j.freeradbiomed.2019.01.023.
- 754 62 BLIGH EG, DYER WJ. A rapid method of total lipid extraction and purification. *Can*  
755 *J Biochem Physiol* 1959; **37**: 911–7. doi:10.1139/o59-099.
- 756 63 Chaves-Filho AB, Pinto IFD, Dantas LS, Xavier AM, Inague A, Faria RL *et al.*  
757 Alterations in lipid metabolism of spinal cord linked to amyotrophic lateral  
758 sclerosis. *Sci Rep* 2019; **9**: 11642. doi:10.1038/s41598-019-48059-7.
- 759 64 Fahy E, Subramaniam S, Murphy RC, Nishijima M, Raetz CRH, Shimizu T *et al.*  
760 Update of the LIPID MAPS comprehensive classification system for lipids. *J Lipid*  
761 *Res* 2009; **50**: S9-14. doi:10.1194/jlr.R800095-JLR200.
- 762 65 Fahy E, Subramaniam S, Brown HA, Glass CK, Merrill AH, Murphy RC *et al.* A  
763 comprehensive classification system for lipids. *J Lipid Res* 2005; **46**: 839–61.  
764 doi:10.1194/jlr.E400004-JLR200.
- 765 66 Epsztejn S, Kakhlon O, Glickstein H, Breuer W, Cabantchik ZI. Fluorescence  
766 analysis of the labile iron pool of mammalian cells. *Anal Biochem* 1997; **248**: 31–  
767 40. doi:10.1006/abio.1997.2126.
- 768
- 769

770 Figures

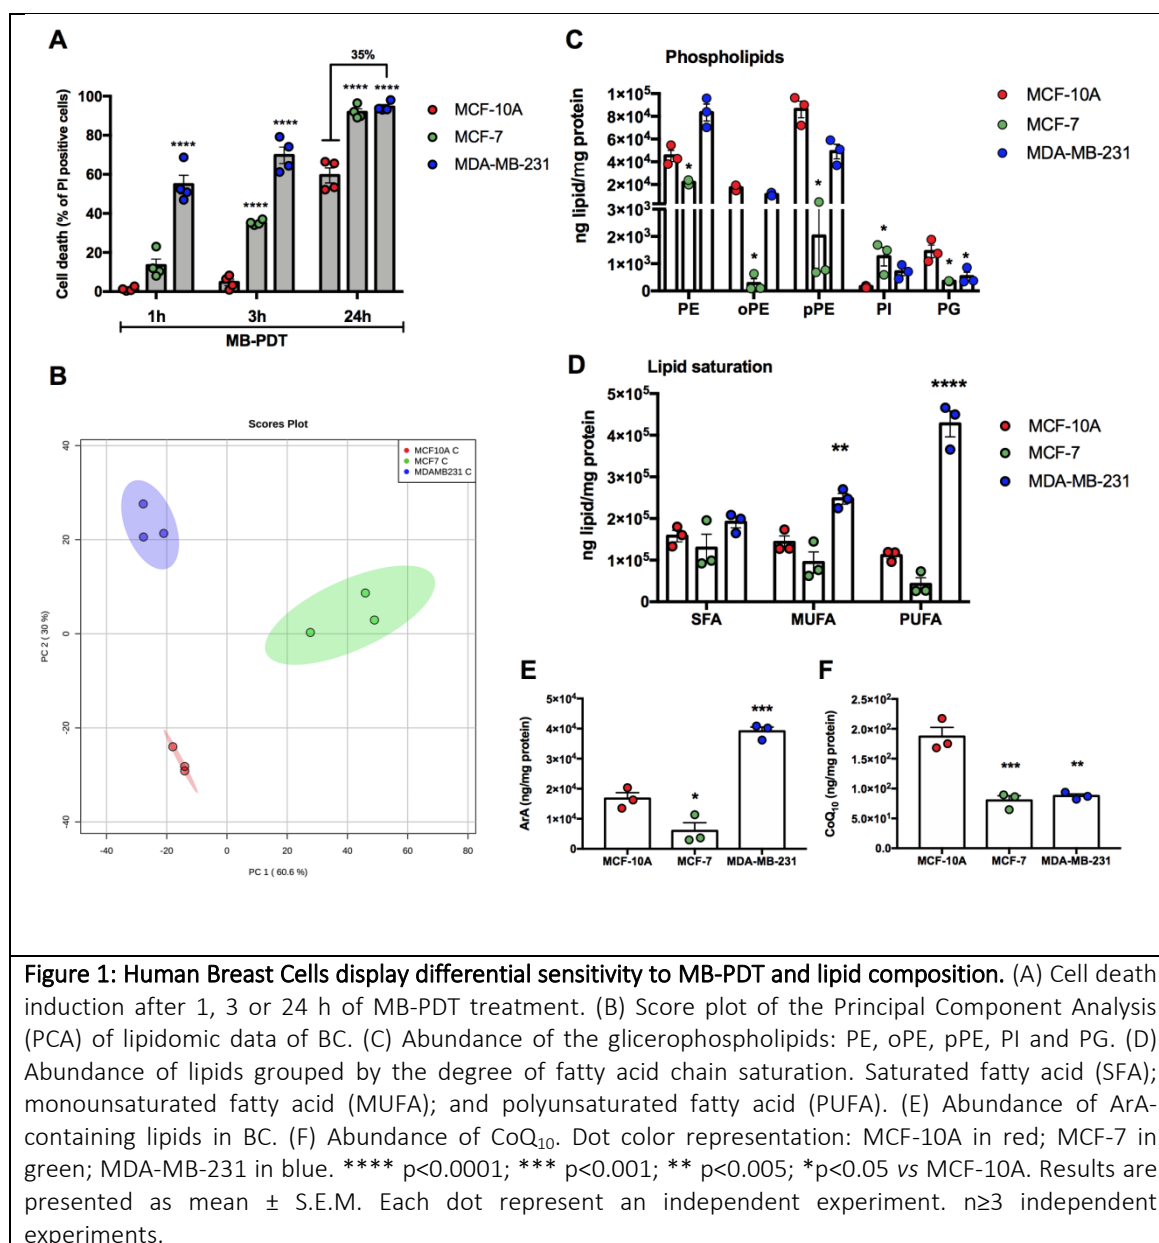

771



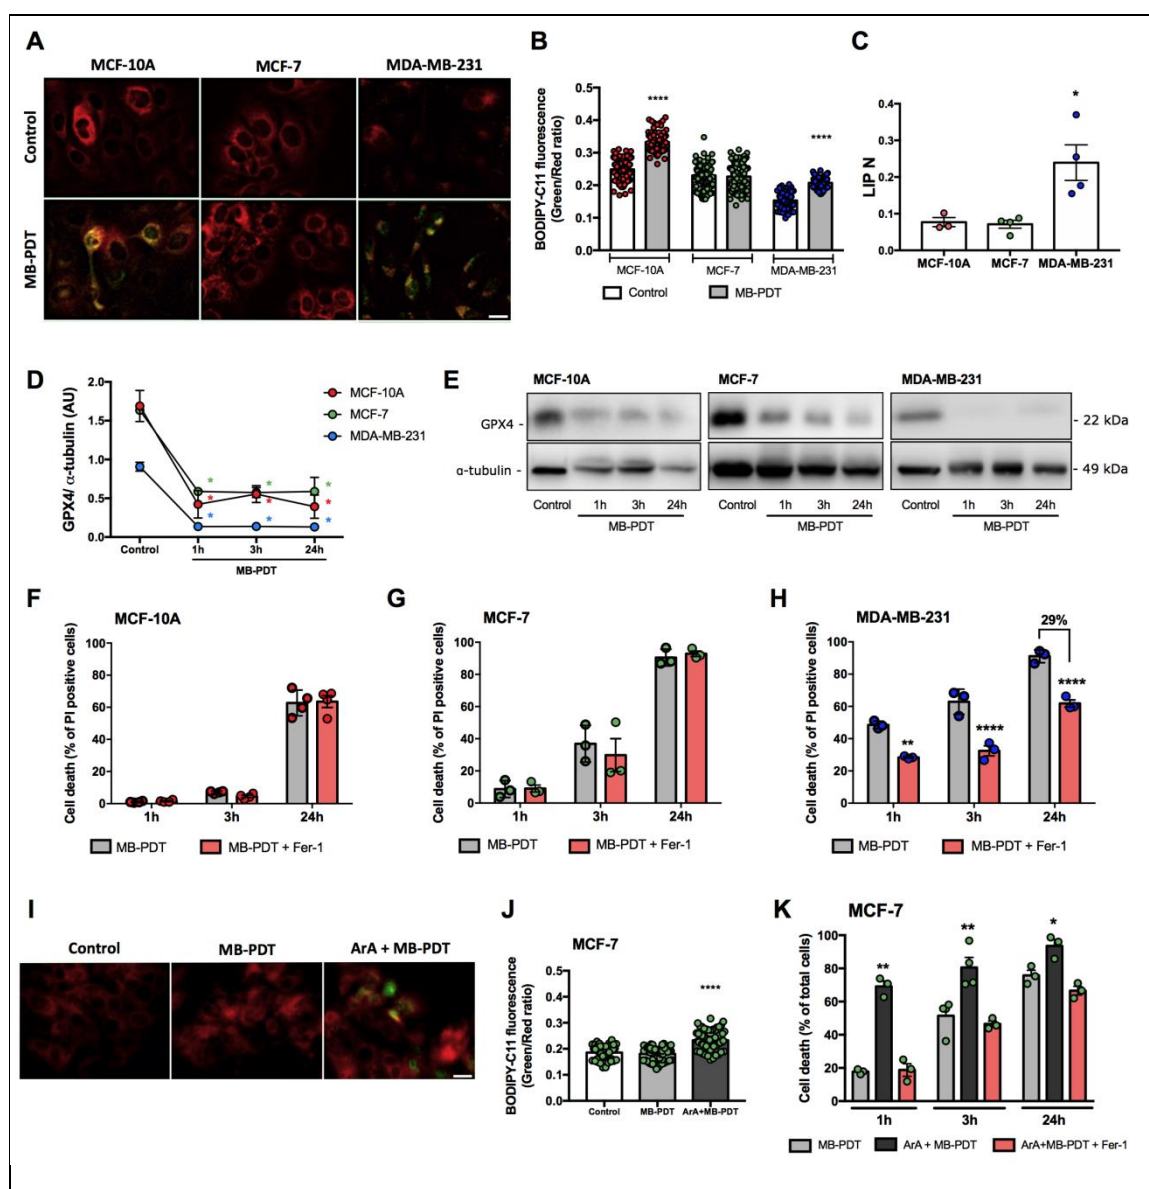

**Figure 2: MB-PDT induces ferroptosis in PUFA- and LIP-enriched cells.** (A) Representative images of lipid peroxidation in cells submitted or not to MB-PDT. Reduced (red) or oxidized (green) BODIPY-C11. (B) Graphical representation of the quantification of the oxidized/reduced BODIPY-C11 ratio/cell. Each dot represents an individual cell. Min. of 100 cells was analysed/experiment. \*\*\*\*  $p < 0.0001$  vs control of each cell line. (C) Intracellular labile iron pool (LIP), normalized by the total intracellular calcein incorporated per cell (LIP N). \*  $p < 0.05$  vs MCF-10A. (D) GPX4 protein quantification in cells after 1, 3 and 24h of being submitted or not to MB-PDT (Control). \*  $p < 0.05$  vs control of each cell line. (E) Representative images of Western blots of GPX4 of BC after being treated or not with MB-PDT, as indicated. Middle panels show the percentage of cell death after MB-PDT (1, 3 or 24h) in cells pretreated or not with Fer-1: (F) MCF-10A, (G) MCF-7 and (H) MDA-MB-231 \*\* $p < 0.005$  vs MB-PDT; \*\*\*\* $p < 0.0001$  vs MB-PDT. (I) Representative images of lipid peroxidation in MCF-7 cells preincubated or not with ArA before being submitted or not to MB-PDT. (J) Corresponding quantification (as described in item B) of oxidized/reduced BODIPY-C11 ratio in MCF-7 cells. \*\*\*\* $p < 0.0001$  vs control. (K) Cell-death percentage of MCF-7 cells pretreated or not with Fer-1 and/or ArA as indicated after 1, 3 or 24h of photooxidation induction. \*\*  $p < 0.005$  vs MB-PDT; \* $p < 0.05$  vs MB-PDT.  $n \geq 3$  independent experiments. Dot color representation: MCF-10A in red; MCF-7 in green; MDA-MB-231 in blue. Results are presented as mean  $\pm$  S.E.M.



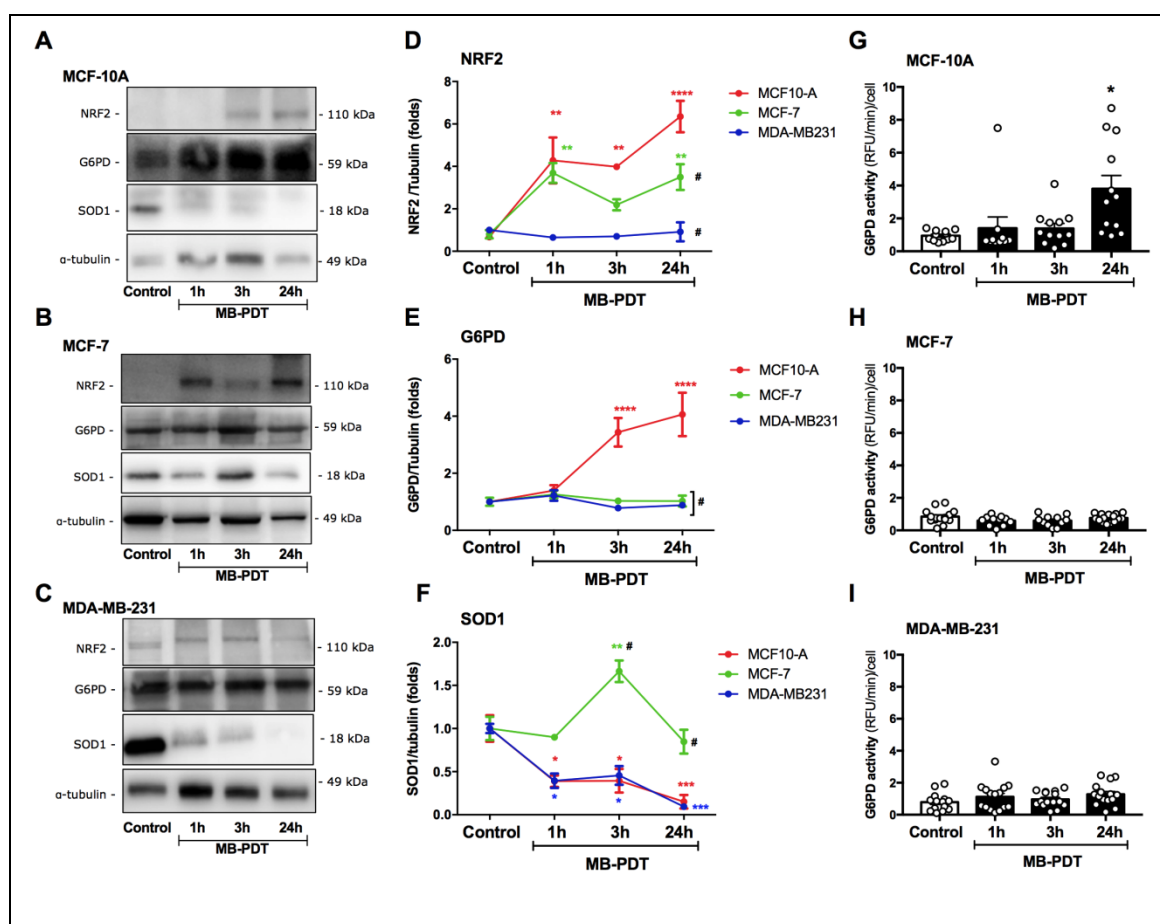

**Figure 3: Non-tumorigenic breast cells display antioxidant response to MB.** Representative images of Western blots of NRF2, G6PD and SOD1 for each BC after being submitted or not with MB-PDT: (A) MCF-10A, (B) MCF-7 and (C)MDA-MB-231. Western blot quantifications of (D) NRF2, (E) G6PD and (F) SOD1 of each BC treated or not with MB-PDT (PDT). Results are presented as folds vs Control condition. Color representation: MCF-10A in red; MCF-7 in green; MDA-MB-231 in blue. G6PD activity in (G) MCF-10A, (H) MCF-7 and (I) MDA-MB-231 cells after being submitted or not to MB-PDT (PDT).  $n \geq 3$  independent experiments. \*\*\*\*  $p < 0.0001$ ; \*\*\*  $p < 0.001$ ; \*\*  $p < 0.005$ ; \*  $p < 0.05$  vs Control; #  $p < 0.05$  vs MCF-10A at each time point. Results are presented as mean  $\pm$  S.E.M.

773

774

775

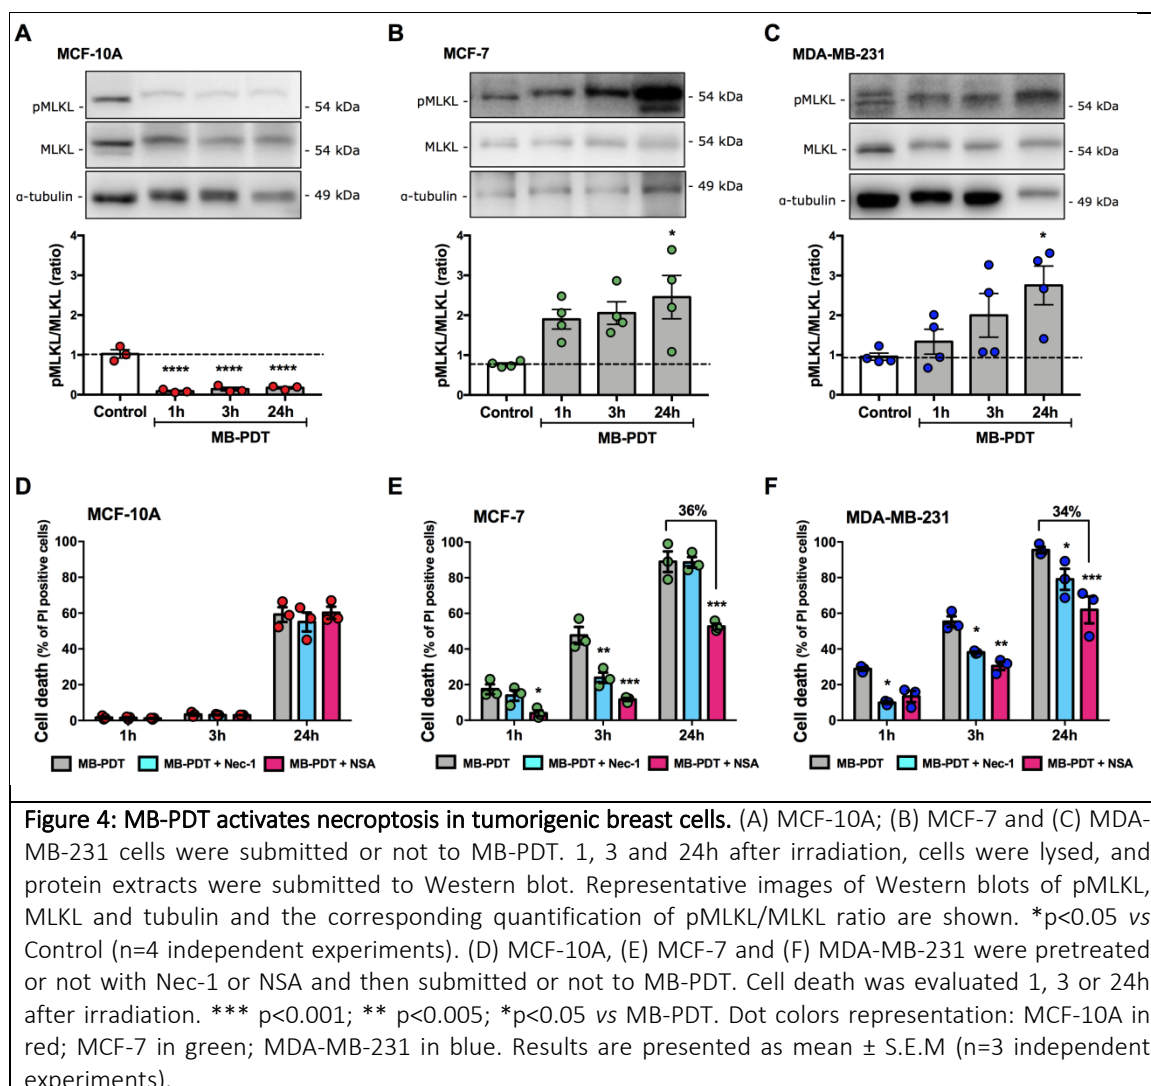

776

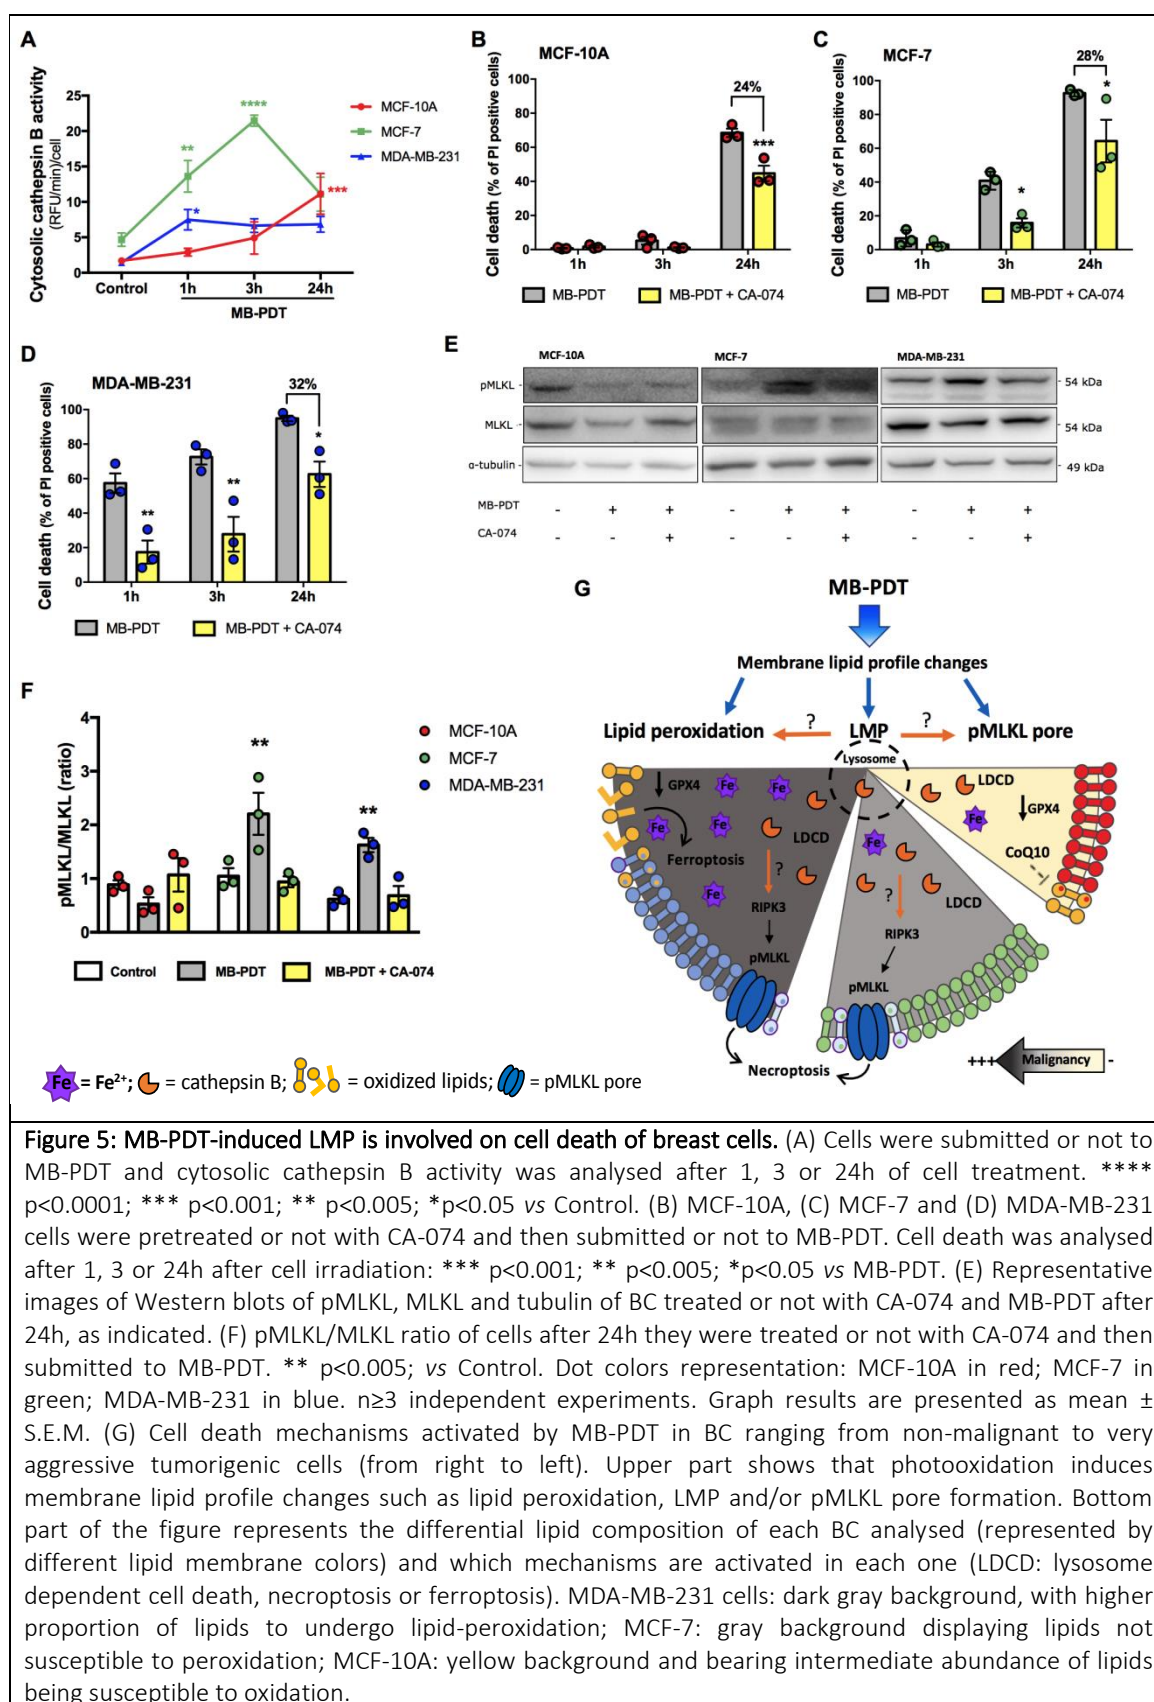

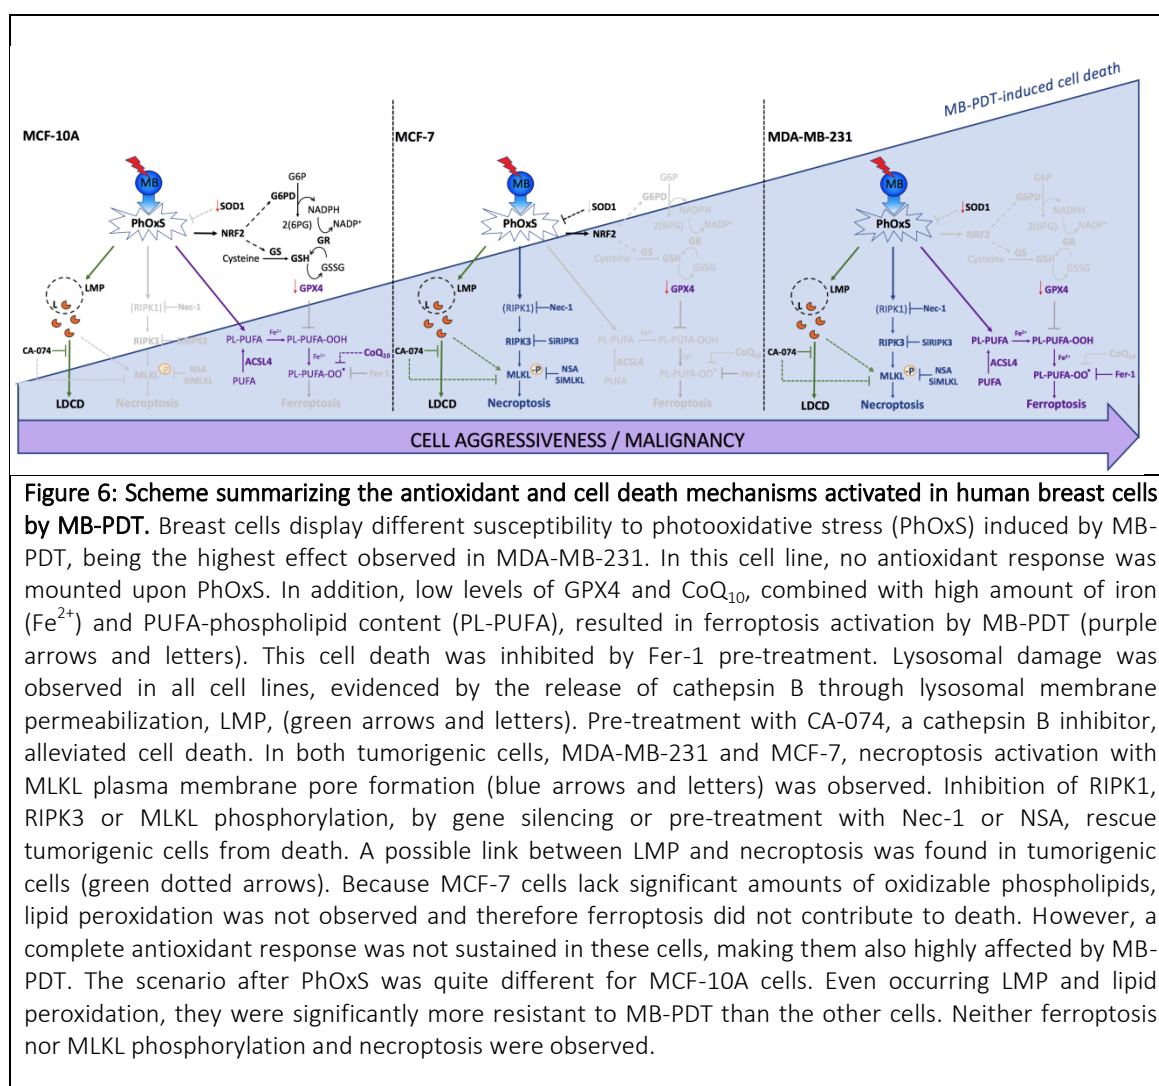

778

## 779 Tables

780 Table1: Antibodies

| <i>Protein</i>     | <i>Company</i> | <i>Catalog</i> | <i>Dilution</i> |
|--------------------|----------------|----------------|-----------------|
| RIPK1              | BD             | #610458        | 1:1000          |
| RIPK3              | Cell Signaling | #13526         | 1:1000          |
| phospho(S345) MLKL | abcam          | ab196436       | 1:1000          |
| MLKL               | abcam          | ab184718       | 1:1000          |

|                             |                     |           |          |
|-----------------------------|---------------------|-----------|----------|
| ACSL4                       | Santa Cruz          | sc-271800 | 1:200    |
| GPX4                        | abcam               | ab125066  | 1:1000   |
| G6PD                        | abcam               | ab993     | 1:2000   |
| NRF2                        | abcam               | ab137550  | 1:1000   |
| SOD1                        | abcam               | ab51254   | 1:2000   |
| SOD2                        | abcam               | ab16956   | 1:1000   |
| Glutathione Reductase       | abcam               | ab128933  | 1:2000   |
| Glutathione Synthetase      | abcam               | ab133592  | 1:2000   |
| alpha-tubulin clone B-5-1-2 | Sigma-Aldrich       | T5168     | 1:10.000 |
| anti-rabbit                 | Vector Laboratories | PI1000    | 1:1000   |
| anti-mouse                  | Vector Laboratories | PI2000    | 1:1000   |

781

782 Table 2: Lipid internal standards (from Avanti Polar Lipids Inc., Alabaster, Alabama, USA)

| <i>Internal standards</i>                                | <i>Lipid</i>   | <i>Concentration<br/>(ng/<math>\mu</math>L)</i> |
|----------------------------------------------------------|----------------|-------------------------------------------------|
| cholest-5-en-3 $\beta$ -yl (decanoate)                   | CE 10:0        | 10                                              |
| N-decanoyl-D-erythro-sphingosine                         | Cer d18:1/10:0 | 10                                              |
| N-heptadecanoyl-D-erythro-sphingosine                    | Cer d18:1/17:0 | 10                                              |
| 1',3'-bis[1,2-dimyristoyl-sn-glycero-3-phospho]-glycerol | CL 14:0 x 4    | 10                                              |

|                                                            |               |    |
|------------------------------------------------------------|---------------|----|
| 1-heptadecanoyl-2-hydroxy-sn-glycero-3-phosphocholine      | LPC 17:0      | 10 |
| 1-(10Z-heptadecenoyl)-sn-glycero-3-phosphoethanolamine     | LPE 17:1      | 10 |
| 1,2-diheptadecanoyl-sn-glycero-3-phosphate                 | PA 17:0/17:0  | 10 |
| 1,2-dimyristoyl-sn-glycero-3-phosphocholine                | PC 14:0/14:0  | 10 |
| 1,2-diheptadecanoyl-sn-glycero-3-phosphocholine            | PC 17:0/17:0  | 10 |
| 1,2-dimyristoyl-sn-glycero-3-phosphoethanolamine           | PE 14:0/14:0  | 10 |
| 1,2-diheptadecanoyl-sn-glycero-3-phosphoethanolamine       | PE 17:0/17:0  | 10 |
| 1,2-diheptadecanoyl-sn-glycero-3-phospho-(1'-rac-glycerol) | PG 17:0/17:0  | 10 |
| 1,2-diheptadecanoyl-sn-glycero-3-phospho-L-serine          | PS 17:0/17:0  | 10 |
| N-heptadecanoyl-D-erythro-sphingosylphosphorylcholine      | SG d18:1/17:0 | 10 |
| 1,2,3-tritetradecanoyl-sn-glycerol                         | TG 14:0 x 3   | 10 |
| 1,2,3-triheptadecanoyl-sn-glycerol                         | TG 17:0 x 3   | 10 |

---

783

784

785 Supplementary Figures  
786

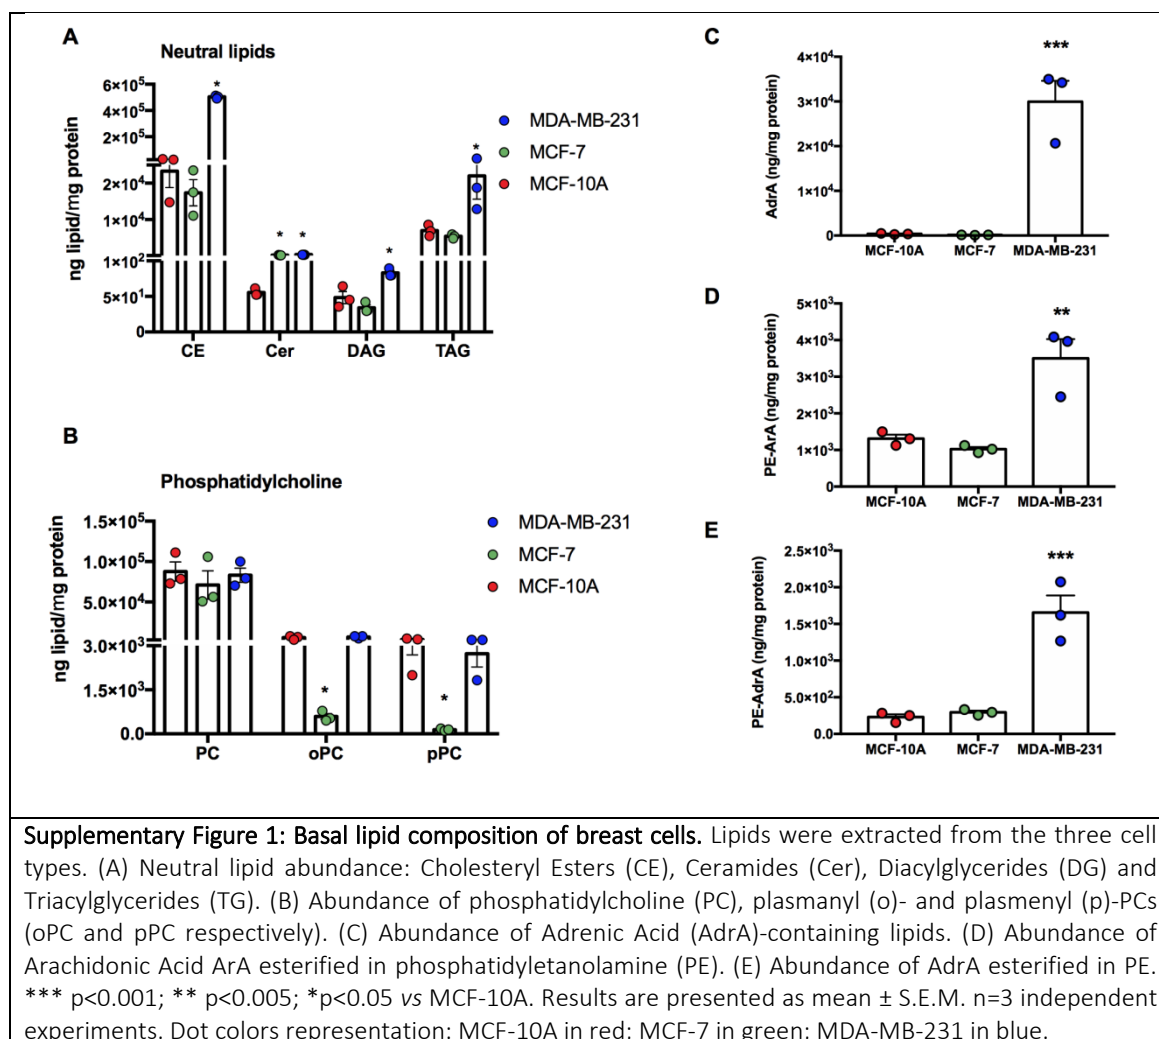

787  
788

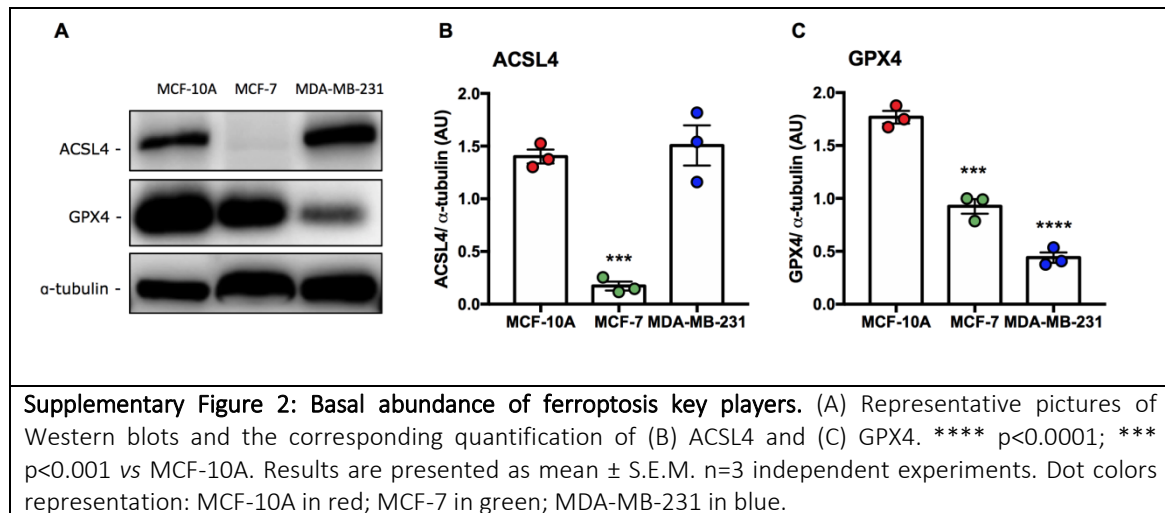

789

790



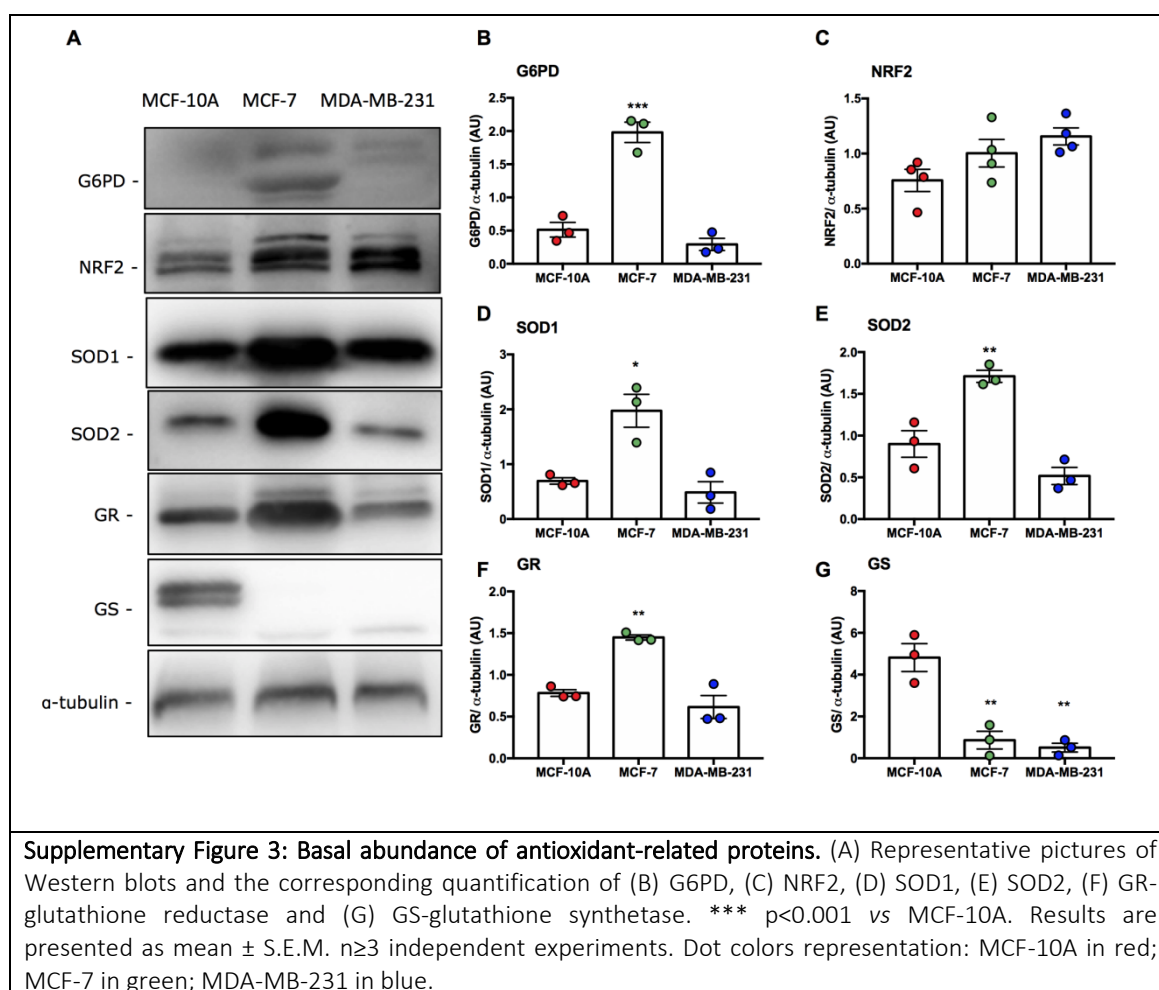

791  
792

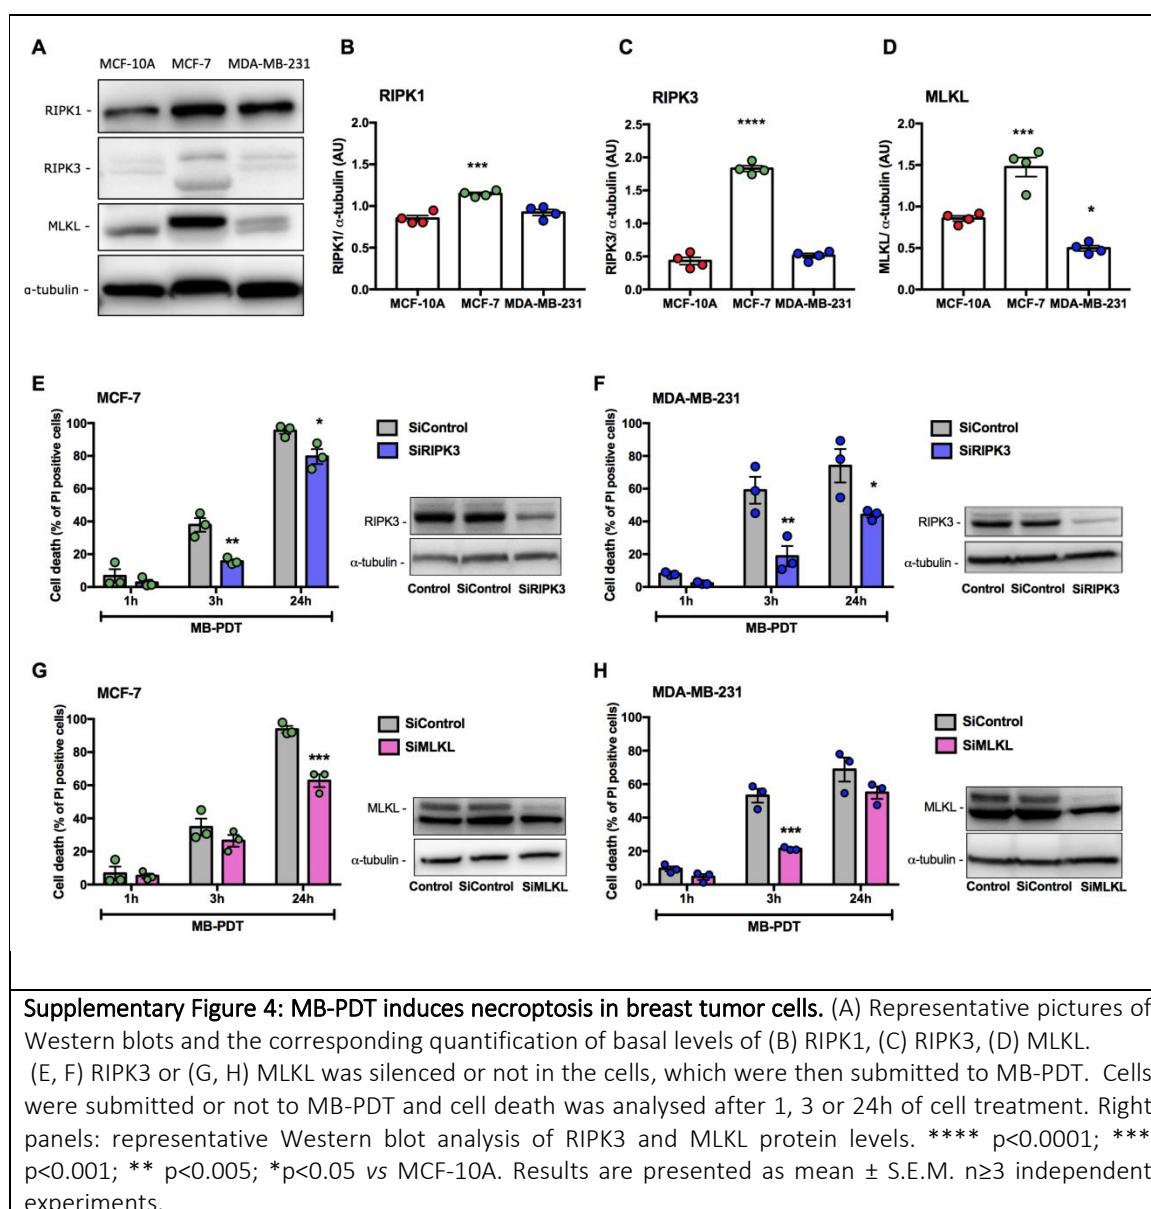

793
